# Supplementary material for: A biophysical threshold for biofilm formation
Source: eLife. 2022 Jun 1;11:e76380. doi: 10.7554/eLife.76380 (PMC9302973; doi:10.7554/eLife.76380)
Supplement: Figure 1—figure supplement 1—source data 1. [file elife-76380-fig1-figsupp1-data1.xlsx]

## Sheet: Fig S4
All Times	X data, Position, x/x0	0	0.4	0.8	1.2	1.6	2	2.4	2.8	3.2	3.6	4	4.4	4.8	5.2	5.6	6	6.4	6.8	7.2	7.6	8	8.4	8.8	9.2	9.6	10	10.4	10.8	11.2	11.6	12	12.4	12.8	13.2	13.6	14	14.4	14.8	15.2	15.6	16	16.4	16.8	17.2	17.6	18	18.4	18.8
0 Hr	Y data, Nutrient, c/c0	1	1	1	1	1	1	1	1	1	1	1	1	1	1	1	1	1	1	1	1	1	1	1	1	1	1	1	1	1	1	1	1	1	1	1	1	1	1	1	1	1	1	1	1	1	1	1	1
	Y data, Planktonic, b1/b10	1	0.895025	0.641713	0.368567	0.169576	0.0625	0.018453	0.0043644	0.0008269	0.000125502	1.52588e-05	1.48614e-06	1.1595e-07	7.24684e-09	3.62827e-10	1.45519e-11	4.67532e-13	1.2033e-14	2.48088e-16	4.09739e-18	5.42101e-20	5.74544e-22	4.87795e-24	3.31758e-26	1.80749e-28	7.88861e-31	2.75801e-33	7.72434e-36	1.733e-38	3.11461e-41	4.48416e-44	5.17164e-47	4.77799e-50	3.53617e-53	2.09649e-56	9.95682e-60	3.78809e-63	1.15449e-66	2.81858e-70	5.51239e-74	8.63617e-78	1.08386e-81	1.08967e-85	8.77579e-90	5.66172e-94	2.92605e-98	1.21139e-102	4.01752e-107
	Y data, Autoinducer, a/a*	0	0	0	0	0	0	0	0	0	0	0	0	0	0	0	0	0	0	0	0	0	0	0	0	0	0	0	0	0	0	0	0	0	0	0	0	0	0	0	0	0	0	0	0	0	0	0	0
	Y data, Biofilm, b2/b10	0	0	0	0	0	0	0	0	0	0	0	0	0	0	0	0	0	0	0	0	0	0	0	0	0	0	0	0	0	0	0	0	0	0	0	0	0	0	0	0	0	0	0	0	0	0	0	0
6 Hr	Y data, Nutrient, c/c0	0.684166	0.684401	0.685107	0.68628	0.68792	0.690023	0.692584	0.695597	0.699058	0.702958	0.707291	0.712046	0.717216	0.722788	0.728754	0.7351	0.741816	0.748888	0.756304	0.764049	0.77211	0.780474	0.789124	0.798048	0.807229	0.816653	0.826306	0.836171	0.846235	0.856481	0.866897	0.877466	0.888175	0.89901	0.909957	0.921002	0.932132	0.943335	0.954597	0.965907	0.977251	0.98862	1	1	1	1	1	1
	Y data, Planktonic, b1/b10	0.188202	0.188006	0.187418	0.186442	0.185082	0.183345	0.181239	0.178773	0.175959	0.172809	0.16934	0.165565	0.161502	0.157168	0.152583	0.147766	0.142738	0.137519	0.132129	0.126592	0.120927	0.115157	0.109302	0.103384	0.0974231	0.0914393	0.0854524	0.0794815	0.0735448	0.06766	0.0618433	0.05611	0.0504732	0.0449441	0.0395308	0.0342378	0.0290658	0.0240105	0.0190628	0.0142087	0.00942938	0.00470238	0	0	0	0	0	0
	Y data, Autoinducer, a/a*	0.679814	0.679127	0.677071	0.673654	0.668891	0.662804	0.655419	0.646769	0.63689	0.625828	0.613628	0.600343	0.586031	0.570751	0.554567	0.537547	0.519761	0.501282	0.482182	0.462539	0.442431	0.421934	0.401128	0.380092	0.358906	0.337649	0.3164	0.295238	0.274243	0.253492	0.233066	0.213041	0.193496	0.174509	0.156159	0.138523	0.121684	0.105725	0.0907399	0.0768336	0.0641308	0.0527846	0.0429878	0.034986	0.0284568	0.0231339	0.0187982	0.0152693
	Y data, Biofilm, b2/b10	0	0	0	0	0	0	0	0	0	0	0	0	0	0	0	0	0	0	0	0	0	0	0	0	0	0	0	0	0	0	0	0	0	0	0	0	0	0	0	0	0	0	0	0	0	0	0	0
13 Hr	Y data, Nutrient, c/c0	0.105282	0.105553	0.106391	0.107816	0.109848	0.112502	0.115792	0.119728	0.124318	0.129566	0.135475	0.142047	0.14928	0.15717	0.165712	0.1749	0.184726	0.195179	0.206251	0.217928	0.2302	0.243051	0.256468	0.270437	0.284941	0.299966	0.315495	0.331511	0.347998	0.364938	0.382314	0.400108	0.418304	0.436883	0.455827	0.475119	0.494742	0.514678	0.534909	0.555418	0.576188	0.597203	0.618445	0.639899	0.661548	0.683376	0.705369	0.727512
	Y data, Planktonic, b1/b10	0.222323	0.231435	0.240161	0.247682	0.254029	0.259246	0.263379	0.266477	0.268593	0.269783	0.270105	0.269619	0.268386	0.266464	0.263911	0.260786	0.25714	0.253027	0.248492	0.243582	0.238336	0.232792	0.226985	0.220945	0.214702	0.20828	0.201704	0.194997	0.188177	0.181265	0.174278	0.167234	0.160148	0.153037	0.145915	0.138797	0.131696	0.124627	0.117602	0.110633	0.103734	0.0969168	0.0901917	0.0835702	0.0770628	0.0706792	0.0644283	0.0583177
	Y data, Autoinducer, a/a*	0.999998	0.994003	0.991337	0.990695	0.991056	0.991629	0.991815	0.991166	0.989363	0.986188	0.981506	0.975246	0.967387	0.957947	0.946974	0.934533	0.920705	0.905579	0.889247	0.871801	0.853334	0.833934	0.813687	0.792674	0.77097	0.74865	0.725782	0.702431	0.67866	0.65453	0.630098	0.605422	0.580557	0.555558	0.530478	0.50537	0.480288	0.455283	0.430407	0.405711	0.381249	0.357071	0.33323	0.309778	0.286767	0.264251	0.242284	0.22092
	Y data, Biofilm, b2/b10	0.933572	0.466786	0	0	0	0	0	0	0	0	0	0	0	0	0	0	0	0	0	0	0	0	0	0	0	0	0	0	0	0	0	0	0	0	0	0	0	0	0	0	0	0	0	0	0	0	0	0
16 Hr	Y data, Nutrient, c/c0	0	0	0	0	0	0	0	0	0.000156265	0.00103812	0.00265273	0.00500408	0.00809438	0.011924	0.0164912	0.0217924	0.0278215	0.0345704	0.0420291	0.0501864	0.0590428	0.0685979	0.0788492	0.0897919	0.101419	0.113722	0.12669	0.140312	0.154574	0.169462	0.184962	0.201057	0.217732	0.23497	0.252753	0.271064	0.289884	0.309196	0.32898	0.349218	0.369891	0.390979	0.412463	0.434324	0.456543	0.4791	0.501977	0.525155
	Y data, Planktonic, b1/b10	0.277948	0.278131	0.278678	0.279586	0.280851	0.282465	0.28442	0.286709	0.289341	0.291468	0.293019	0.29391	0.294076	0.293457	0.292005	0.289689	0.286512	0.282521	0.278135	0.278401	0.278252	0.277262	0.275398	0.272693	0.269223	0.265092	0.2604	0.255242	0.249692	0.243807	0.237632	0.231202	0.224547	0.217691	0.21066	0.203476	0.196161	0.188738	0.181227	0.173652	0.166031	0.158385	0.150735	0.143097	0.13549	0.127932	0.120438	0.113024
	Y data, Autoinducer, a/a*	0.356858	0.361326	0.374887	0.398014	0.431532	0.476658	0.535068	0.608968	0.701192	0.77608	0.836226	0.88389	0.92099	0.949164	0.96982	0.984195	0.993397	0.99845	0.999998	0.998185	0.99411	0.987781	0.979252	0.968627	0.956051	0.941693	0.925724	0.908308	0.88959	0.8697	0.848751	0.826846	0.80408	0.780542	0.756317	0.731487	0.706134	0.680337	0.654173	0.627718	0.601047	0.574231	0.547343	0.520452	0.493625	0.466929	0.440426	0.41418
	Y data, Biofilm, b2/b10	2.43869	1.21934	0	0	0	0	0	0	0	0	0	0	0	0	0	0	0	0.0090031	0.0392904	0.0302873	0	0	0	0	0	0	0	0	0	0	0	0	0	0	0	0	0	0	0	0	0	0	0	0	0	0	0	0
20 Hr	Y data, Nutrient, c/c0	0	0	0	0	0	0	0	0	0	0	0	0	0	0	0	0	0	0	0	0.000224421	0.00119728	0.00291811	0.00538343	0.00858778	0.0125241	0.0171839	0.0225576	0.0286343	0.0354019	0.0428434	0.0509675	0.0597774	0.0692739	0.0794555	0.0903187	0.101858	0.114067	0.126937	0.140458	0.15462	0.169411	0.184816	0.200822	0.217414	0.234576	0.25229	0.27054	0.289308
	Y data, Planktonic, b1/b10	0.297773	0.297775	0.297784	0.297797	0.297815	0.297837	0.297863	0.297891	0.297919	0.297948	0.297974	0.297996	0.298012	0.298021	0.298021	0.298014	0.298002	0.297992	0.298005	0.298088	0.297415	0.295998	0.293867	0.291094	0.287764	0.283928	0.279566	0.274583	0.267989	0.271431	0.272955	0.273389	0.272844	0.27148	0.269416	0.266728	0.26346	0.259646	0.25532	0.250516	0.245271	0.239622	0.233607	0.227266	0.220633	0.213744	0.206634	0.199335
	Y data, Autoinducer, a/a*	0.0613511	0.0621764	0.0646743	0.0689123	0.0750038	0.083111	0.0934472	0.106282	0.121945	0.140839	0.163445	0.190348	0.222255	0.260034	0.304758	0.357764	0.420722	0.49572	0.585357	0.692854	0.778973	0.846564	0.898268	0.936757	0.964384	0.983067	0.994368	0.999618	0.999999	0.998732	0.996043	0.991733	0.985723	0.977998	0.968566	0.957455	0.9447	0.930353	0.914479	0.897155	0.878469	0.858513	0.837387	0.81519	0.792024	0.76799	0.74319	0.717723
	Y data, Biofilm, b2/b10	2.43869	1.21934	0	0	0	0	0	0	0	0	0	0	0	0	0	0	0	0.00945295	0.0811762	0.147804	0.165077	0.185187	0.187679	0.177245	0.168994	0.165574	0.162784	0.157728	0.0927788	0.0154984	0	0	0	0	0	0	0	0	0	0	0	0	0	0	0	0	0	0
[truncated: 827 more columns]
