# Supplementary material for: A biophysical threshold for biofilm formation
Source: eLife. 2022 Jun 1;11:e76380. doi: 10.7554/eLife.76380 (PMC9302973; doi:10.7554/eLife.76380)
Supplement: Figure 1—figure supplement 2—source data 1. [file elife-76380-fig1-figsupp2-data1.xlsx]

## Sheet: Fig S6
All Times	X data, Position, x/x0	0	0.4	0.8	1.2	1.6	2	2.4	2.8	3.2	3.6	4	4.4	4.8	5.2	5.6	6	6.4	6.8	7.2	7.6	8	8.4	8.8	9.2	9.6	10	10.4	10.8	11.2	11.6	12	12.4	12.8	13.2	13.6	14	14.4	14.8	15.2	15.6	16	16.4	16.8	17.2	17.6	18	18.4	18.8
0 Hr	Y data, Nutrient, c/c0	1	1	1	1	1	1	1	1	1	1	1	1	1	1	1	1	1	1	1	1	1	1	1	1	1	1	1	1	1	1	1	1	1	1	1	1	1	1	1	1	1	1	1	1	1	1	1	1
	Y data, Planktonic, b1/b10	1	1	1	0	0	0	0	0	0	0	0	0	0	0	0	0	0	0	0	0	0	0	0	0	0	0	0	0	0	0	0	0	0	0	0	0	0	0	0	0	0	0	0	0	0	0	0	0
	Y data, Autoinducer, a/a*	0	0	0	0	0	0	0	0	0	0	0	0	0	0	0	0	0	0	0	0	0	0	0	0	0	0	0	0	0	0	0	0	0	0	0	0	0	0	0	0	0	0	0	0	0	0	0	0
	Y data, Biofilm, b2/b10	0	0	0	0	0	0	0	0	0	0	0	0	0	0	0	0	0	0	0	0	0	0	0	0	0	0	0	0	0	0	0	0	0	0	0	0	0	0	0	0	0	0	0	0	0	0	0	0
6 Hr	Y data, Nutrient, c/c0	0.718019	0.718239	0.718897	0.719991	0.721521	0.723482	0.725871	0.728681	0.731908	0.735545	0.739584	0.744016	0.748833	0.754025	0.759582	0.765492	0.771744	0.778327	0.785226	0.792431	0.799927	0.8077	0.815738	0.824026	0.832549	0.841294	0.850247	0.859392	0.868716	0.878204	0.887843	0.897618	0.907517	0.917524	0.927628	0.937815	0.948073	0.958389	0.968751	0.979149	0.989569	1	1	1	1	1	1	1
	Y data, Planktonic, b1/b10	0.175497	0.17531	0.174749	0.173817	0.172519	0.17086	0.168849	0.166495	0.163808	0.160801	0.157487	0.153882	0.150002	0.145864	0.141485	0.136884	0.132081	0.127095	0.121947	0.116656	0.111244	0.10573	0.100134	0.0944779	0.0887798	0.0830595	0.0773359	0.0716274	0.065952	0.0603268	0.054768	0.0492902	0.0439065	0.038627	0.0334588	0.0284046	0.0234626	0.0186255	0.0138808	0.00921061	0.00459287	0	0	0	0	0	0	0
	Y data, Autoinducer, a/a*	0.635476	0.634818	0.632846	0.62957	0.625004	0.619169	0.612089	0.603796	0.594327	0.583722	0.572028	0.559296	0.545579	0.530936	0.515429	0.499122	0.482084	0.464384	0.446093	0.427287	0.408038	0.388425	0.368522	0.348408	0.32816	0.307857	0.287577	0.267399	0.247402	0.227667	0.208275	0.189305	0.170841	0.152964	0.135759	0.11931	0.103707	0.0890454	0.0754329	0.0629944	0.0518814	0.0422831	0.0344402	0.0280377	0.0228154	0.0185591	0.0150925	0.0122706
	Y data, Biofilm, b2/b10	0	0	0	0	0	0	0	0	0	0	0	0	0	0	0	0	0	0	0	0	0	0	0	0	0	0	0	0	0	0	0	0	0	0	0	0	0	0	0	0	0	0	0	0	0	0	0	0
13 Hr	Y data, Nutrient, c/c0	0.0840084	0.0842831	0.085129	0.0865686	0.0886212	0.091303	0.0946277	0.0986057	0.103245	0.108552	0.114529	0.121177	0.128495	0.136481	0.14513	0.154435	0.164389	0.174983	0.186207	0.19805	0.210499	0.223543	0.237166	0.251356	0.266097	0.281374	0.29717	0.313471	0.330259	0.347517	0.365229	0.383377	0.401945	0.420913	0.440266	0.459986	0.480054	0.500453	0.521167	0.542177	0.563466	0.585017	0.606814	0.62884	0.651078	0.673512	0.696127	0.718906
	Y data, Planktonic, b1/b10	0.221782	0.230991	0.239849	0.247498	0.253967	0.259299	0.263539	0.266738	0.268951	0.270234	0.270646	0.270248	0.269101	0.267266	0.264802	0.261766	0.258213	0.254193	0.249756	0.244944	0.239798	0.234357	0.228653	0.222716	0.216575	0.210255	0.203779	0.197168	0.190443	0.18362	0.176718	0.169754	0.162742	0.155698	0.148637	0.141572	0.134518	0.127488	0.120494	0.113549	0.106666	0.0998547	0.0931274	0.0864943	0.0799659	0.0735518	0.0672619	0.0611059
	Y data, Autoinducer, a/a*	0.999998	0.994103	0.991533	0.991031	0.991564	0.992333	0.992731	0.992308	0.99074	0.98781	0.983381	0.977383	0.969797	0.96064	0.949961	0.937827	0.924317	0.909521	0.89353	0.876435	0.858328	0.839294	0.819418	0.798777	0.777446	0.755494	0.732988	0.709992	0.686564	0.662763	0.638645	0.614265	0.589675	0.564929	0.540078	0.515174	0.490268	0.465412	0.440654	0.416048	0.391641	0.367487	0.343633	0.320133	0.297036	0.274394	0.25226	0.23069
	Y data, Biofilm, b2/b10	0.926677	0.46506	0.00172132	0	0	0	0	0	0	0	0	0	0	0	0	0	0	0	0	0	0	0	0	0	0	0	0	0	0	0	0	0	0	0	0	0	0	0	0	0	0	0	0	0	0	0	0	0
16 Hr	Y data, Nutrient, c/c0	0	0	0	0	0	0	0	0	0.000226281	0.0011814	0.00287125	0.00529906	0.00846616	0.012372	0.0170141	0.0223883	0.0284886	0.0353081	0.0428391	0.0510697	0.0600048	0.0696422	0.0799768	0.0910021	0.10271	0.115089	0.128131	0.14182	0.156146	0.171092	0.186645	0.202788	0.219505	0.236778	0.254591	0.272926	0.291765	0.311089	0.330879	0.351116	0.371782	0.392858	0.414324	0.43616	0.458349	0.480871	0.503707	0.526839
	Y data, Planktonic, b1/b10	0.279535	0.279714	0.280247	0.281129	0.28235	0.283898	0.285755	0.287909	0.290363	0.292255	0.293512	0.294066	0.293882	0.292954	0.291307	0.289012	0.286174	0.282893	0.277588	0.280209	0.279597	0.277767	0.275136	0.271851	0.267976	0.263568	0.258689	0.253397	0.247744	0.241777	0.235532	0.229043	0.222338	0.215442	0.20838	0.201174	0.193847	0.186421	0.178916	0.171353	0.163753	0.156135	0.148517	0.140918	0.133355	0.125845	0.118403	0.111043
	Y data, Autoinducer, a/a*	0.370799	0.375359	0.389173	0.41265	0.44652	0.491896	0.550351	0.624018	0.715692	0.78954	0.848258	0.894215	0.929463	0.955783	0.974724	0.987641	0.995716	0.999963	1	0.99755	0.992649	0.985426	0.976042	0.964654	0.951418	0.936495	0.92004	0.9022	0.88311	0.862892	0.841657	0.819505	0.79653	0.77282	0.748461	0.723532	0.698114	0.672284	0.646117	0.619689	0.59307	0.566333	0.539546	0.512777	0.486091	0.459552	0.433222	0.407162
	Y data, Biofilm, b2/b10	2.17243	1.08796	0.00174796	0	0	0	0	0	0	0	0	0	0	0	0	0	0	0.0332658	0.0373042	0.00403835	0	0	0	0	0	0	0	0	0	0	0	0	0	0	0	0	0	0	0	0	0	0	0	0	0	0	0	0
20 Hr	Y data, Nutrient, c/c0	0	0	0	0	0	0	0	0	0	0	0	0	0	0	0	0	0	0.000336638	0.00142363	0.00325968	0.00584064	0.00916011	0.0132097	0.017979	0.0234562	0.0296283	0.0364812	0.0440177	0.0522393	0.0611471	0.0707402	0.0810165	0.0919719	0.103601	0.115896	0.128849	0.142449	0.156685	0.171545	0.187014	0.203079	0.219723	0.23693	0.254683	0.272965	0.291757	0.311042	0.330799
	Y data, Planktonic, b1/b10	0.298059	0.298065	0.298083	0.298113	0.298154	0.298206	0.298266	0.298333	0.298406	0.29848	0.298553	0.29862	0.298674	0.29871	0.298724	0.298714	0.298694	0.298701	0.29788	0.296214	0.293704	0.290389	0.286342	0.281678	0.276573	0.271093	0.272221	0.272985	0.273337	0.273123	0.272263	0.270729	0.268531	0.265695	0.262258	0.258262	0.253751	0.248767	0.243353	0.237549	0.231394	0.224928	0.218186	0.211203	0.204013	0.196648	0.189139	0.181515
	Y data, Autoinducer, a/a*	0.0883256	0.0895096	0.0930945	0.0991811	0.107939	0.119613	0.134523	0.15307	0.175738	0.203094	0.2358	0.274619	0.320459	0.374433	0.43795	0.512851	0.601541	0.707144	0.791807	0.857956	0.908201	0.944916	0.970346	0.986824	0.99621	0.999998	0.999663	0.997909	0.994654	0.9898	0.983268	0.975016	0.965036	0.953352	0.94001	0.925075	0.908627	0.890754	0.87155	0.851113	0.829545	0.806949	0.783426	0.759078	0.734006	0.70831	0.682085	0.655426
	Y data, Biofilm, b2/b10	2.17243	1.08796	0.00174796	0	0	0	0	0	0	0	0	0	0	0	0	0	0	0.0348703	0.0996129	0.144395	0.170442	0.18595	0.182555	0.171284	0.166587	0.157296	0.0745976	0	0	0	0	0	0	0	0	0	0	0	0	0	0	0	0	0	0	0	0	0
[truncated: 827 more columns]
