# Supplementary material for: A biophysical threshold for biofilm formation
Source: eLife. 2022 Jun 1;11:e76380. doi: 10.7554/eLife.76380 (PMC9302973; doi:10.7554/eLife.76380)
Supplement: Figure 1—source data 1. [file elife-76380-fig1-data1.xlsx]

## Sheet: Fig 1C
All Times	X data, Position, x/x0	0	0.4	0.8	1.2	1.6	2	2.4	2.8	3.2	3.6	4	4.4	4.8	5.2	5.6	6	6.4	6.8	7.2	7.6	8	8.4	8.8	9.2	9.6	10	10.4	10.8	11.2	11.6	12	12.4	12.8	13.2	13.6	14	14.4	14.8	15.2	15.6	16	16.4	16.8	17.2	17.6	18	18.4	18.8
0 Hr	Y data, Nutrient, c/c0	1	1	1	1	1	1	1	1	1	1	1	1	1	1	1	1	1	1	1	1	1	1	1	1	1	1	1	1	1	1	1	1	1	1	1	1	1	1	1	1	1	1	1	1	1	1	1	1
	Y data, Planktonic, b1/b10	1	0.895025	0.641713	0.368567	0.169576	0.0625	0.018453	0.0043644	0.0008269	0.000125502	1.52588e-05	1.48614e-06	1.1595e-07	7.24684e-09	3.62827e-10	1.45519e-11	4.67532e-13	1.2033e-14	2.48088e-16	4.09739e-18	5.42101e-20	5.74544e-22	4.87795e-24	3.31758e-26	1.80749e-28	7.88861e-31	2.75801e-33	7.72434e-36	1.733e-38	3.11461e-41	4.48416e-44	5.17164e-47	4.77799e-50	3.53617e-53	2.09649e-56	9.95682e-60	3.78809e-63	1.15449e-66	2.81858e-70	5.51239e-74	8.63617e-78	1.08386e-81	1.08967e-85	8.77579e-90	5.66172e-94	2.92605e-98	1.21139e-102	4.01752e-107
	Y data, Autoinducer, a/a*	0	0	0	0	0	0	0	0	0	0	0	0	0	0	0	0	0	0	0	0	0	0	0	0	0	0	0	0	0	0	0	0	0	0	0	0	0	0	0	0	0	0	0	0	0	0	0	0
	Y data, Biofilm, b2/b10	0	0	0	0	0	0	0	0	0	0	0	0	0	0	0	0	0	0	0	0	0	0	0	0	0	0	0	0	0	0	0	0	0	0	0	0	0	0	0	0	0	0	0	0	0	0	0	0
6 Hr	Y data, Nutrient, c/c0	0.684166	0.684401	0.685107	0.68628	0.68792	0.690023	0.692584	0.695597	0.699058	0.702958	0.707291	0.712046	0.717216	0.722788	0.728754	0.7351	0.741816	0.748888	0.756304	0.764049	0.77211	0.780474	0.789124	0.798048	0.807229	0.816653	0.826306	0.836171	0.846235	0.856481	0.866897	0.877466	0.888175	0.89901	0.909957	0.921002	0.932132	0.943335	0.954597	0.965907	0.977251	0.98862	1	1	1	1	1	1
	Y data, Planktonic, b1/b10	0.188202	0.188006	0.187418	0.186442	0.185082	0.183345	0.181239	0.178773	0.175959	0.172809	0.16934	0.165565	0.161502	0.157168	0.152583	0.147766	0.142738	0.137519	0.132129	0.126592	0.120927	0.115157	0.109302	0.103384	0.0974231	0.0914393	0.0854524	0.0794815	0.0735448	0.06766	0.0618433	0.05611	0.0504732	0.0449441	0.0395308	0.0342378	0.0290658	0.0240105	0.0190628	0.0142087	0.00942938	0.00470238	0	0	0	0	0	0
	Y data, Autoinducer, a/a*	0.679814	0.679127	0.677071	0.673654	0.668891	0.662804	0.655419	0.646769	0.63689	0.625828	0.613628	0.600343	0.586031	0.570751	0.554567	0.537547	0.519761	0.501282	0.482182	0.462539	0.442431	0.421934	0.401128	0.380092	0.358906	0.337649	0.3164	0.295238	0.274243	0.253492	0.233066	0.213041	0.193496	0.174509	0.156159	0.138523	0.121684	0.105725	0.0907399	0.0768336	0.0641308	0.0527846	0.0429878	0.034986	0.0284568	0.0231339	0.0187982	0.0152693
	Y data, Biofilm, b2/b10	0	0	0	0	0	0	0	0	0	0	0	0	0	0	0	0	0	0	0	0	0	0	0	0	0	0	0	0	0	0	0	0	0	0	0	0	0	0	0	0	0	0	0	0	0	0	0	0
13 Hr	Y data, Nutrient, c/c0	0.105304	0.105575	0.106411	0.107836	0.109868	0.112522	0.115812	0.119748	0.124337	0.129585	0.135494	0.142066	0.149298	0.157188	0.165729	0.174917	0.184742	0.195196	0.206267	0.217944	0.230215	0.243065	0.256482	0.270451	0.284955	0.299979	0.315508	0.331523	0.34801	0.364949	0.382325	0.400119	0.418314	0.436892	0.455837	0.475129	0.494751	0.514686	0.534917	0.555426	0.576195	0.59721	0.618452	0.639905	0.661553	0.683382	0.705374	0.727516
	Y data, Planktonic, b1/b10	0.220697	0.231423	0.240143	0.247663	0.254013	0.259232	0.263367	0.266466	0.268583	0.269775	0.270098	0.269614	0.268381	0.266459	0.263908	0.260783	0.257138	0.253025	0.248491	0.243581	0.238335	0.232792	0.226985	0.220945	0.214702	0.20828	0.201704	0.194996	0.188177	0.181265	0.174278	0.167234	0.160148	0.153037	0.145915	0.138797	0.131696	0.124627	0.117602	0.110633	0.103734	0.0969168	0.0901917	0.0835702	0.0770628	0.0706792	0.0644283	0.0583177
	Y data, Autoinducer, a/a*	0.999999	0.993996	0.991324	0.990678	0.991038	0.991611	0.991796	0.991148	0.989346	0.986173	0.981492	0.975234	0.967376	0.957938	0.946966	0.934527	0.9207	0.905575	0.889243	0.871798	0.853332	0.833933	0.813686	0.792673	0.77097	0.74865	0.725781	0.702431	0.67866	0.654529	0.630098	0.605422	0.580557	0.555558	0.530478	0.50537	0.480288	0.455283	0.430407	0.405711	0.381249	0.357071	0.33323	0.309778	0.286767	0.264251	0.242284	0.22092
	Y data, Biofilm, b2/b10	0.936184	0.468092	0	0	0	0	0	0	0	0	0	0	0	0	0	0	0	0	0	0	0	0	0	0	0	0	0	0	0	0	0	0	0	0	0	0	0	0	0	0	0	0	0	0	0	0	0	0
16 Hr	Y data, Nutrient, c/c0	0	0	0	0	0	0	0	0	0.000156188	0.00103792	0.00265236	0.00500353	0.00809368	0.0119232	0.0164904	0.0217917	0.0278211	0.0345706	0.0420299	0.0501868	0.059043	0.068598	0.0788493	0.0897921	0.101419	0.113723	0.126691	0.140313	0.154575	0.169463	0.184963	0.201058	0.217733	0.234971	0.252754	0.271065	0.289886	0.309197	0.328982	0.34922	0.369892	0.39098	0.412464	0.434325	0.456544	0.479101	0.501978	0.525156
	Y data, Planktonic, b1/b10	0.277918	0.278101	0.278648	0.279556	0.280822	0.282437	0.284394	0.286685	0.289321	0.291453	0.293011	0.293909	0.294083	0.293471	0.292023	0.289708	0.286532	0.282535	0.277634	0.278405	0.278254	0.277259	0.275395	0.272689	0.269219	0.265087	0.260395	0.255236	0.249685	0.2438	0.237626	0.231196	0.224542	0.217687	0.210656	0.203472	0.196158	0.188735	0.181225	0.173649	0.166029	0.158384	0.150733	0.143096	0.135489	0.127931	0.120437	0.113023
	Y data, Autoinducer, a/a*	0.356922	0.36139	0.374948	0.398072	0.431585	0.476705	0.535107	0.608999	0.701214	0.776096	0.836239	0.883902	0.921003	0.949177	0.969833	0.984204	0.9934	0.998444	0.999998	0.998181	0.994101	0.987768	0.979235	0.968607	0.956029	0.94167	0.925701	0.908285	0.889568	0.869679	0.848731	0.826828	0.804063	0.780527	0.756303	0.731475	0.706124	0.680328	0.654165	0.627711	0.60104	0.574226	0.547338	0.520448	0.493622	0.466925	0.440423	0.414177
	Y data, Biofilm, b2/b10	2.44162	1.22081	0	0	0	0	0	0	0	0	0	0	0	0	0	0	0	0.00849158	0.0393395	0.0308479	0	0	0	0	0	0	0	0	0	0	0	0	0	0	0	0	0	0	0	0	0	0	0	0	0	0	0	0
20 Hr	Y data, Nutrient, c/c0	0	0	0	0	0	0	0	0	0	0	0	0	0	0	0	0	0	0	0	0.000224471	0.0011974	0.00291832	0.00538377	0.00858831	0.0125248	0.0171849	0.0225586	0.028635	0.0354013	0.0428437	0.0509678	0.0597774	0.0692737	0.0794551	0.0903181	0.101858	0.114066	0.126936	0.140458	0.15462	0.16941	0.184816	0.200822	0.217415	0.234576	0.252291	0.270541	0.289308
	Y data, Planktonic, b1/b10	0.297769	0.297772	0.29778	0.297794	0.297812	0.297834	0.29786	0.297888	0.297917	0.297945	0.297972	0.297994	0.29801	0.298019	0.29802	0.298013	0.298001	0.297991	0.298003	0.298086	0.297413	0.295993	0.293858	0.291079	0.287741	0.283904	0.279553	0.274563	0.269154	0.271443	0.272991	0.273412	0.272856	0.271485	0.269418	0.266728	0.263459	0.259646	0.255319	0.250515	0.24527	0.239621	0.233606	0.227264	0.220631	0.213743	0.206633	0.199334
	Y data, Autoinducer, a/a*	0.0613496	0.0621748	0.0646727	0.0689107	0.0750022	0.0831092	0.0934453	0.10628	0.121943	0.140836	0.163442	0.190345	0.222251	0.260029	0.304753	0.35776	0.420719	0.49572	0.58536	0.692861	0.778962	0.846565	0.898263	0.936747	0.964377	0.983051	0.994364	0.999619	0.999996	0.998738	0.996049	0.991737	0.985725	0.977997	0.968565	0.957453	0.944698	0.93035	0.914476	0.897152	0.878465	0.85851	0.837383	0.815186	0.79202	0.767986	0.743186	0.717719
	Y data, Biofilm, b2/b10	2.44162	1.22081	0	0	0	0	0	0	0	0	0	0	0	0	0	0	0	0.00891589	0.0806798	0.148489	0.164892	0.18489	0.188159	0.176978	0.16916	0.16552	0.162631	0.158258	0.0921513	0.0146228	0	0	0	0	0	0	0	0	0	0	0	0	0	0	0	0	0	0
[truncated: 827 more columns]
