# Supplementary material for: A biophysical threshold for biofilm formation
Source: eLife. 2022 Jun 1;11:e76380. doi: 10.7554/eLife.76380 (PMC9302973; doi:10.7554/eLife.76380)
Supplement: Figure 2—figure supplement 1—source data 1. [file elife-76380-fig2-figsupp1-data1.xlsx]

## Sheet: Sheet1
All Times	X data, Position, x/x0	0	0.4	0.8	1.2	1.6	2	2.4	2.8	3.2	3.6	4	4.4	4.8	5.2	5.6	6	6.4	6.8	7.2	7.6	8	8.4	8.8	9.2	9.6	10	10.4	10.8	11.2	11.6	12	12.4	12.8	13.2	13.6	14	14.4	14.8	15.2	15.6	16	16.4	16.8	17.2	17.6	18	18.4	18.8
0 Hr	Y data, Nutrient, c/c0	1	1	1	1	1	1	1	1	1	1	1	1	1	1	1	1	1	1	1	1	1	1	1	1	1	1	1	1	1	1	1	1	1	1	1	1	1	1	1	1	1	1	1	1	1	1	1	1
	Y data, Planktonic, b1/b10	1	0.895025	0.641713	0.368567	0.169576	0.0625	0.018453	0.0043644	0.0008269	0.000125502	1.52588e-05	1.48614e-06	1.1595e-07	7.24684e-09	3.62827e-10	1.45519e-11	4.67532e-13	1.2033e-14	2.48088e-16	4.09739e-18	5.42101e-20	5.74544e-22	4.87795e-24	3.31758e-26	1.80749e-28	7.88861e-31	2.75801e-33	7.72434e-36	1.733e-38	3.11461e-41	4.48416e-44	5.17164e-47	4.77799e-50	3.53617e-53	2.09649e-56	9.95682e-60	3.78809e-63	1.15449e-66	2.81858e-70	5.51239e-74	8.63617e-78	1.08386e-81	1.08967e-85	8.77579e-90	5.66172e-94	2.92605e-98	1.21139e-102	4.01752e-107
	Y data, Autoinducer, a/a*	0	0	0	0	0	0	0	0	0	0	0	0	0	0	0	0	0	0	0	0	0	0	0	0	0	0	0	0	0	0	0	0	0	0	0	0	0	0	0	0	0	0	0	0	0	0	0	0
	Y data, Biofilm, b2/b10	0	0	0	0	0	0	0	0	0	0	0	0	0	0	0	0	0	0	0	0	0	0	0	0	0	0	0	0	0	0	0	0	0	0	0	0	0	0	0	0	0	0	0	0	0	0	0	0
4 Hr	Y data, Nutrient, c/c0	0.976617	0.976639	0.976704	0.976814	0.976966	0.977162	0.9774	0.977679	0.977999	0.978359	0.978758	0.979195	0.979668	0.980176	0.980719	0.981293	0.981899	0.982535	0.983199	0.983889	0.984604	0.985342	0.986102	0.986882	0.987681	0.988497	0.989328	0.990173	0.99103	0.991899	0.992777	0.993664	0.994557	0.995457	0.99636	0.997268	0.998177	0.999088	1	1	1	1	1	1	1	1	1	1
	Y data, Planktonic, b1/b10	0.179752	0.179492	0.178716	0.177428	0.175638	0.173358	0.170605	0.167397	0.163756	0.159708	0.15528	0.1505	0.145399	0.14001	0.134365	0.1285	0.122447	0.116242	0.109917	0.103507	0.0970439	0.0905586	0.0840812	0.07764	0.0712615	0.06497	0.0587874	0.0527325	0.0468205	0.0410625	0.0354648	0.030029	0.0247542	0.0196469	0.0147455	0.0101628	0.00610613	0.00276228	0	0	0	0	0	0	0	0	0	0
	Y data, Autoinducer, a/a*	0.649798	0.648888	0.646162	0.641641	0.635354	0.627344	0.617665	0.60638	0.593565	0.579303	0.563687	0.546816	0.528797	0.509741	0.489766	0.468991	0.447538	0.42553	0.403091	0.380344	0.357413	0.334415	0.311469	0.288689	0.266186	0.244065	0.22243	0.201379	0.181005	0.161397	0.142641	0.124821	0.108021	0.0923317	0.0778572	0.0647275	0.0530938	0.043089	0.034755	0.0280453	0.0226283	0.0182485	0.0147066	0.0118439	0.00953184	0.00766616	0.0061618	0.00494964
	Y data, Biofilm, b2/b10	0	0	0	0	0	0	0	0	0	0	0	0	0	0	0	0	0	0	0	0	0	0	0	0	0	0	0	0	0	0	0	0	0	0	0	0	0	0	0	0	0	0	0	0	0	0	0	0
8 Hr	Y data, Nutrient, c/c0	0.956778	0.956804	0.956882	0.95701	0.95719	0.957421	0.957703	0.958034	0.958415	0.958845	0.959323	0.959849	0.960421	0.961038	0.961701	0.962407	0.963155	0.963945	0.964774	0.965643	0.966549	0.967492	0.968469	0.96948	0.970522	0.971596	0.972698	0.973828	0.974984	0.976165	0.977369	0.978595	0.979841	0.981105	0.982387	0.983684	0.984996	0.986321	0.987658	0.989004	0.99036	0.991723	0.993093	0.994468	0.995848	0.99723	0.998615	1
	Y data, Planktonic, b1/b10	0.208385	0.208211	0.207689	0.206823	0.205614	0.204067	0.202188	0.199984	0.197462	0.194632	0.191502	0.188086	0.184393	0.180438	0.176233	0.171794	0.167134	0.16227	0.157217	0.151991	0.146609	0.141089	0.135447	0.129699	0.123865	0.117959	0.111999	0.106002	0.0999841	0.0939608	0.0879474	0.0819588	0.0760089	0.070111	0.0642783	0.0585233	0.052859	0.0472993	0.0418592	0.0365552	0.0314045	0.0264232	0.0216233	0.0170086	0.0125705	0.00828533	0.00411344	0
	Y data, Autoinducer, a/a*	0.749888	0.749283	0.747472	0.74446	0.740258	0.734878	0.72834	0.720664	0.711877	0.702006	0.691084	0.679148	0.666235	0.652388	0.637651	0.622071	0.6057	0.588587	0.570788	0.552357	0.533354	0.513836	0.493863	0.473497	0.4528	0.431835	0.410665	0.389354	0.367966	0.346565	0.325216	0.303983	0.282931	0.262126	0.241632	0.221516	0.201849	0.182701	0.164151	0.146279	0.129174	0.112926	0.0976313	0.083387	0.0702907	0.0584443	0.0479606	0.038977
	Y data, Biofilm, b2/b10	0	0	0	0	0	0	0	0	0	0	0	0	0	0	0	0	0	0	0	0	0	0	0	0	0	0	0	0	0	0	0	0	0	0	0	0	0	0	0	0	0	0	0	0	0	0	0	0
14 Hr	Y data, Nutrient, c/c0	0.901703	0.901728	0.901803	0.901931	0.902115	0.902357	0.902659	0.903022	0.903449	0.90394	0.904497	0.90512	0.905809	0.906566	0.907389	0.90828	0.909237	0.910261	0.911351	0.912505	0.913724	0.915006	0.91635	0.917754	0.919219	0.920741	0.92232	0.923955	0.925643	0.927383	0.929173	0.931011	0.932897	0.934827	0.936801	0.938816	0.94087	0.942962	0.94509	0.947252	0.949446	0.951671	0.953924	0.956204	0.958509	0.960837	0.963188	0.965558
	Y data, Planktonic, b1/b10	0.191047	0.202833	0.214335	0.224668	0.233849	0.241908	0.248877	0.254791	0.259687	0.263606	0.266589	0.268678	0.269918	0.270353	0.270029	0.26899	0.267281	0.264947	0.262032	0.258578	0.254628	0.250222	0.245399	0.240199	0.234656	0.228806	0.222682	0.216315	0.209737	0.202976	0.196058	0.18901	0.181856	0.174619	0.16732	0.15998	0.152618	0.145254	0.137903	0.130583	0.123308	0.116094	0.108954	0.101901	0.094946	0.0881017	0.0813781	0.0747854
	Y data, Autoinducer, a/a*	0.999999	0.985216	0.977075	0.97368	0.973504	0.975333	0.978203	0.981357	0.984209	0.986312	0.987331	0.987025	0.985225	0.981825	0.976765	0.970024	0.961614	0.951566	0.939934	0.926783	0.912188	0.896234	0.879009	0.860602	0.841107	0.820615	0.799218	0.777006	0.754068	0.730488	0.70635	0.681733	0.656717	0.631374	0.605779	0.579999	0.554103	0.528154	0.502217	0.476351	0.450616	0.425069	0.399766	0.374762	0.35011	0.325864	0.302076	0.278798
	Y data, Biofilm, b2/b10	2.12351	1.06175	0	0	0	0	0	0	0	0	0	0	0	0	0	0	0	0	0	0	0	0	0	0	0	0	0	0	0	0	0	0	0	0	0	0	0	0	0	0	0	0	0	0	0	0	0	0
20 Hr	Y data, Nutrient, c/c0	0.859648	0.85966	0.859682	0.859718	0.859772	0.859847	0.859947	0.860077	0.860239	0.860438	0.860677	0.860958	0.861285	0.86166	0.862086	0.862566	0.863102	0.863694	0.864346	0.865059	0.865834	0.866671	0.867573	0.868539	0.86957	0.870666	0.871827	0.873053	0.874344	0.875702	0.877127	0.878619	0.880178	0.881806	0.8835	0.88526	0.887087	0.888979	0.890935	0.892955	0.895036	0.897178	0.89938	0.901639	0.903954	0.906324	0.908747	0.911221
	Y data, Planktonic, b1/b10	0.0247864	0.0412557	0.0575419	0.0735736	0.0892813	0.104598	0.119459	0.133805	0.147577	0.160724	0.173195	0.184948	0.195943	0.206144	0.215523	0.224055	0.231724	0.238515	0.244424	0.24945	0.253592	0.256854	0.259231	0.260715	0.261287	0.260939	0.260107	0.263932	0.267245	0.269592	0.270986	0.271473	0.271107	0.26995	0.268062	0.265501	0.262318	0.258564	0.254283	0.249519	0.244312	0.238702	0.232727	0.226424	0.219829	0.212978	0.205905	0.198641
	Y data, Autoinducer, a/a*	1.05551	0.950542	0.872832	0.817383	0.780009	0.7572	0.746013	0.743988	0.749065	0.759527	0.773942	0.791128	0.810108	0.830087	0.850424	0.870613	0.890271	0.90912	0.926981	0.943767	0.958452	0.971097	0.981626	0.989945	0.995969	0.999569	0.999999	0.999529	0.998567	0.996678	0.993551	0.988974	0.982817	0.975011	0.965534	0.954394	0.941628	0.927288	0.91144	0.894161	0.875535	0.855652	0.834608	0.8125	0.789427	0.765489	0.740786	0.715416
	Y data, Biofilm, b2/b10	13.3958	6.6979	0	0	0	0	0	0	0	0	0	0	0	0	0	0	0	0	0	0.0282631	0.0560043	0.0600826	0.0707751	0.0837771	0.0997961	0.13638	0.108516	0.0265884	0	0	0	0	0	0	0	0	0	0	0	0	0	0	0	0	0	0	0	0
[truncated: 827 more columns]
