# Supplementary material for: A biophysical threshold for biofilm formation
Source: eLife. 2022 Jun 1;11:e76380. doi: 10.7554/eLife.76380 (PMC9302973; doi:10.7554/eLife.76380)
Supplement: Figure 2—source data 1. [file elife-76380-fig2-data1.xlsx]

## Sheet: Sheet1
All Times	X data, Position, x/x0	0	0.4	0.8	1.2	1.6	2	2.4	2.8	3.2	3.6	4	4.4	4.8	5.2	5.6	6	6.4	6.8	7.2	7.6	8	8.4	8.8	9.2	9.6	10	10.4	10.8	11.2	11.6	12	12.4	12.8	13.2	13.6	14	14.4	14.8	15.2	15.6	16	16.4	16.8	17.2	17.6	18	18.4	18.8
0 Hr	Y data, Nutrient, c/c0	1	1	1	1	1	1	1	1	1	1	1	1	1	1	1	1	1	1	1	1	1	1	1	1	1	1	1	1	1	1	1	1	1	1	1	1	1	1	1	1	1	1	1	1	1	1	1	1
	Y data, Planktonic, b1/b10	1	0.895025	0.641713	0.368567	0.169576	0.0625	0.018453	0.0043644	0.0008269	0.000125502	1.52588e-05	1.48614e-06	1.1595e-07	7.24684e-09	3.62827e-10	1.45519e-11	4.67532e-13	1.2033e-14	2.48088e-16	4.09739e-18	5.42101e-20	5.74544e-22	4.87795e-24	3.31758e-26	1.80749e-28	7.88861e-31	2.75801e-33	7.72434e-36	1.733e-38	3.11461e-41	4.48416e-44	5.17164e-47	4.77799e-50	3.53617e-53	2.09649e-56	9.95682e-60	3.78809e-63	1.15449e-66	2.81858e-70	5.51239e-74	8.63617e-78	1.08386e-81	1.08967e-85	8.77579e-90	5.66172e-94	2.92605e-98	1.21139e-102	4.01752e-107
	Y data, Autoinducer, a/a*	0	0	0	0	0	0	0	0	0	0	0	0	0	0	0	0	0	0	0	0	0	0	0	0	0	0	0	0	0	0	0	0	0	0	0	0	0	0	0	0	0	0	0	0	0	0	0	0
	Y data, Biofilm, b2/b10	0	0	0	0	0	0	0	0	0	0	0	0	0	0	0	0	0	0	0	0	0	0	0	0	0	0	0	0	0	0	0	0	0	0	0	0	0	0	0	0	0	0	0	0	0	0	0	0
0.5 Hr	Y data, Nutrient, c/c0	0	0.00329401	0.0143663	0.0330075	0.0588686	0.0914835	0.130295	0.174682	0.223992	0.277561	0.334745	0.394933	0.457567	0.522148	0.588243	0.655484	0.723563	0.792233	0.861295	0.930593	1	1	1	1	1	1	1	1	1	1	1	1	1	1	1	1	1	1	1	1	1	1	1	1	1	1	1	1
	Y data, Planktonic, b1/b10	0.311712	0.309173	0.300796	0.286938	0.268442	0.246345	0.22176	0.195811	0.169564	0.143964	0.119787	0.0976117	0.0778122	0.0605715	0.045907	0.0337078	0.0237711	0.0158259	0.00952994	0.00444211	0	0	0	0	0	0	0	0	0	0	0	0	0	0	0	0	0	0	0	0	0	0	0	0	0	0	0	0
	Y data, Autoinducer, a/a*	0.63677	0.64725	0.638043	0.612734	0.575248	0.529057	0.477126	0.422074	0.366246	0.311691	0.260095	0.212735	0.170456	0.133696	0.102539	0.0767796	0.0560105	0.0396942	0.0272287	0.0180016	0.0114533	0.00717302	0.00442484	0.0026896	0.00161113	0.000951033	0.000553082	0.000316778	0.000178575	9.89605e-05	5.37784e-05	2.85075e-05	1.45668e-05	6.95862e-06	2.78881e-06	5.22316e-07	0	0	0	0	0	0	0	0	0	0	0	0
	Y data, Biofilm, b2/b10	0	0	0	0	0	0	0	0	0	0	0	0	0	0	0	0	0	0	0	0	0	0	0	0	0	0	0	0	0	0	0	0	0	0	0	0	0	0	0	0	0	0	0	0	0	0	0	0
7 Hr	Y data, Nutrient, c/c0	0	0	0	0	0	0	0	0	0	0	0	0	0	8.87433e-05	0.00305203	0.00887447	0.0175167	0.02893	0.0430568	0.0598318	0.0791821	0.101028	0.125284	0.151858	0.180653	0.211568	0.244496	0.27933	0.315955	0.354258	0.394122	0.435428	0.478057	0.521887	0.566799	0.61267	0.65938	0.706809	0.754835	0.803341	0.852213	0.901343	0.950633	1	1	1	1	1
	Y data, Planktonic, b1/b10	0.121454	0.121411	0.121281	0.121067	0.120768	0.120388	0.119929	0.119393	0.118785	0.11811	0.117375	0.116587	0.115754	0.114906	0.113726	0.112184	0.110273	0.10802	0.105449	0.102583	0.0994436	0.0960513	0.0924276	0.0885941	0.0845725	0.0803842	0.0760506	0.0715925	0.0670299	0.0623822	0.0576674	0.0529021	0.0481014	0.0432785	0.0384451	0.0336113	0.0287885	0.0239949	0.0192681	0.014685	0.0103729	0.0064793	0.00306928	0	0	0	0	0
	Y data, Autoinducer, a/a*	0.0480961	0.0487876	0.0508844	0.0544546	0.0596147	0.0665339	0.0754406	0.0866312	0.100481	0.117457	0.138136	0.163223	0.193578	0.230236	0.258894	0.280659	0.29652	0.307315	0.313758	0.31646	0.315948	0.312675	0.307037	0.299377	0.29	0.279173	0.267134	0.254095	0.240249	0.225771	0.210819	0.195542	0.180078	0.164559	0.149112	0.133863	0.11894	0.104479	0.0906305	0.0775655	0.0654775	0.0545657	0.0449954	0.0368638	0.0302286	0.0247997	0.0203475	0.0166915
	Y data, Biofilm, b2/b10	0	0	0	0	0	0	0	0	0	0	0	0	0	0	0	0	0	0	0	0	0	0	0	0	0	0	0	0	0	0	0	0	0	0	0	0	0	0	0	0	0	0	0	0	0	0	0	0
14 Hr	Y data, Nutrient, c/c0	0	0	0	0	0	0	0	0	0	0	0	0	0	0	0	0	0	0	0	0	0.00221412	0.00700382	0.0143535	0.0242391	0.0366289	0.0514838	0.0687577	0.0883975	0.110344	0.134532	0.160891	0.189344	0.21981	0.252203	0.286433	0.322407	0.360027	0.399193	0.439801	0.481747	0.524923	0.569221	0.614531	0.660741	0.70774	0.755416	0.803655	0.852346
	Y data, Planktonic, b1/b10	0.106607	0.106596	0.106562	0.106506	0.106428	0.106328	0.106205	0.106062	0.105896	0.105709	0.105501	0.105272	0.105022	0.10475	0.104458	0.104146	0.103814	0.103464	0.103097	0.102736	0.102401	0.101766	0.100814	0.0995539	0.0980008	0.0961682	0.0940692	0.091717	0.0891252	0.0863076	0.0832783	0.0800518	0.0766429	0.0730665	0.0693378	0.0654723	0.0614853	0.0573919	0.0532071	0.0489453	0.0446202	0.0402445	0.0358299	0.0313865	0.026923	0.0224463	0.0179618	0.0134734
	Y data, Autoinducer, a/a*	0.012838	0.0130414	0.0136572	0.0147036	0.0162108	0.0182221	0.0207949	0.0240021	0.027934	0.0327014	0.038439	0.0453102	0.0535136	0.0632907	0.0749361	0.0888091	0.105349	0.125091	0.148688	0.176936	0.210799	0.237524	0.258133	0.273491	0.284337	0.291301	0.294921	0.295657	0.293908	0.290012	0.284265	0.27692	0.268201	0.258303	0.247398	0.235642	0.223178	0.210137	0.196642	0.18281	0.168757	0.154594	0.140435	0.126396	0.112596	0.0991657	0.0862433	0.0739851
	Y data, Biofilm, b2/b10	0	0	0	0	0	0	0	0	0	0	0	0	0	0	0	0	0	0	0	0	0	0	0	0	0	0	0	0	0	0	0	0	0	0	0	0	0	0	0	0	0	0	0	0	0	0	0	0
20 Hr	Y data, Nutrient, c/c0	0	0	0	0	0	0	0	0	0	0	0	0	0	0	0	0	0	0	0	0	0	0	0	0	0.000571929	0.00366261	0.00926369	0.0173579	0.0279204	0.0409191	0.0563147	0.0740617	0.0941079	0.116395	0.14086	0.167432	0.196037	0.226596	0.259025	0.293234	0.329133	0.366624	0.405608	0.445985	0.487648	0.530492	0.574409	0.61929
	Y data, Planktonic, b1/b10	0.102373	0.102369	0.102357	0.102336	0.102308	0.102272	0.102228	0.102176	0.102117	0.10205	0.101976	0.101894	0.101805	0.101709	0.101605	0.101493	0.101373	0.101245	0.101109	0.100966	0.100816	0.100659	0.100497	0.100338	0.100203	0.0998041	0.0991143	0.0981257	0.09685	0.0952994	0.0934851	0.0914185	0.0891104	0.0865721	0.0838151	0.0808511	0.077692	0.0743499	0.0708375	0.0671679	0.0633549	0.0594129	0.0553578	0.0512062	0.0469763	0.0426872	0.0383586	0.0340102
	Y data, Autoinducer, a/a*	0.00601109	0.00610816	0.00640236	0.00690274	0.00762463	0.00859	0.00982796	0.0113756	0.0132787	0.0155932	0.0183868	0.0217408	0.0257528	0.03054	0.0362434	0.0430329	0.0511136	0.0607342	0.0721961	0.085865	0.102185	0.121696	0.145052	0.173044	0.20663	0.233354	0.254191	0.269969	0.281391	0.289053	0.293463	0.295056	0.294202	0.291221	0.286388	0.279939	0.272083	0.263001	0.252855	0.241791	0.229941	0.217429	0.204376	0.190896	0.177105	0.163119	0.149057	0.13504
	Y data, Biofilm, b2/b10	0	0	0	0	0	0	0	0	0	0	0	0	0	0	0	0	0	0	0	0	0	0	0	0	0	0	0	0	0	0	0	0	0	0	0	0	0	0	0	0	0	0	0	0	0	0	0	0
[truncated: 827 more columns]
