# Supplementary material for: A biophysical threshold for biofilm formation
Source: eLife. 2022 Jun 1;11:e76380. doi: 10.7554/eLife.76380 (PMC9302973; doi:10.7554/eLife.76380)
Supplement: Figure 3—figure supplement 1—source data 1. [file elife-76380-fig3-figsupp1-data1.xlsx]

## Sheet: Sheet1
All Times	X data, Position, x/x0	0	0.4	0.8	1.2	1.6	2	2.4	2.8	3.2	3.6	4	4.4	4.8	5.2	5.6	6	6.4	6.8	7.2	7.6	8	8.4	8.8	9.2	9.6	10	10.4	10.8	11.2	11.6	12	12.4	12.8	13.2	13.6	14	14.4	14.8	15.2	15.6	16	16.4	16.8	17.2	17.6	18	18.4	18.8
0 Hr	Y data, Nutrient, c/c0	1	1	1	1	1	1	1	1	1	1	1	1	1	1	1	1	1	1	1	1	1	1	1	1	1	1	1	1	1	1	1	1	1	1	1	1	1	1	1	1	1	1	1	1	1	1	1	1
	Y data, Planktonic, b1/b10	1	0.895025	0.641713	0.368567	0.169576	0.0625	0.018453	0.0043644	0.0008269	0.000125502	1.52588e-05	1.48614e-06	1.1595e-07	7.24684e-09	3.62827e-10	1.45519e-11	4.67532e-13	1.2033e-14	2.48088e-16	4.09739e-18	5.42101e-20	5.74544e-22	4.87795e-24	3.31758e-26	1.80749e-28	7.88861e-31	2.75801e-33	7.72434e-36	1.733e-38	3.11461e-41	4.48416e-44	5.17164e-47	4.77799e-50	3.53617e-53	2.09649e-56	9.95682e-60	3.78809e-63	1.15449e-66	2.81858e-70	5.51239e-74	8.63617e-78	1.08386e-81	1.08967e-85	8.77579e-90	5.66172e-94	2.92605e-98	1.21139e-102	4.01752e-107
	Y data, Autoinducer, a/a*	0	0	0	0	0	0	0	0	0	0	0	0	0	0	0	0	0	0	0	0	0	0	0	0	0	0	0	0	0	0	0	0	0	0	0	0	0	0	0	0	0	0	0	0	0	0	0	0
	Y data, Biofilm, b2/b10	0	0	0	0	0	0	0	0	0	0	0	0	0	0	0	0	0	0	0	0	0	0	0	0	0	0	0	0	0	0	0	0	0	0	0	0	0	0	0	0	0	0	0	0	0	0	0	0
0.5 Hr	Y data, Nutrient, c/c0	0.938332	0.939274	0.942001	0.946243	0.951638	0.957822	0.964493	0.971435	0.978514	0.985656	0.992824	1	1	1	1	1	1	1	1	1	1	1	1	1	1	1	1	1	1	1	1	1	1	1	1	1	1	1	1	1	1	1	1	1	1	1	1	1
	Y data, Planktonic, b1/b10	0.749261	0.709303	0.601984	0.458516	0.313966	0.193711	0.107982	0.0545447	0.0250233	0.0103665	0.00357001	0	0	0	0	0	0	0	0	0	0	0	0	0	0	0	0	0	0	0	0	0	0	0	0	0	0	0	0	0	0	0	0	0	0	0	0	0
	Y data, Autoinducer, a/a*	0.990853	0.96626	0.896909	0.794575	0.674636	0.551861	0.437406	0.33776	0.255281	0.189506	0.138482	0.0997537	0.0709829	0.0498781	0.0345983	0.0236842	0.0159958	0.0106561	0.0070007	0.00453481	0.00289586	0.00182276	0.00113071	0.000691133	0.000416155	0.000246753	0.000143972	8.25485e-05	4.63834e-05	2.53951e-05	1.33788e-05	6.56754e-06	2.67438e-06	4.42435e-07	0	0	0	0	0	0	0	0	0	0	0	0	0	0
	Y data, Biofilm, b2/b10	0	0	0	0	0	0	0	0	0	0	0	0	0	0	0	0	0	0	0	0	0	0	0	0	0	0	0	0	0	0	0	0	0	0	0	0	0	0	0	0	0	0	0	0	0	0	0	0
1 Hr	Y data, Nutrient, c/c0	0.954084	0.954488	0.955874	0.958326	0.961792	0.96611	0.971074	0.976485	0.982182	0.988048	0.994005	1	1	1	1	1	1	1	1	1	1	1	1	1	1	1	1	1	1	1	1	1	1	1	1	1	1	1	1	1	1	1	1	1	1	1	1	1
	Y data, Planktonic, b1/b10	0.320828	0.389668	0.423556	0.402607	0.338614	0.256546	0.177709	0.113608	0.067126	0.0359121	0.0153013	0	0	0	0	0	0	0	0	0	0	0	0	0	0	0	0	0	0	0	0	0	0	0	0	0	0	0	0	0	0	0	0	0	0	0	0	0
	Y data, Autoinducer, a/a*	0.999993	0.984698	0.951999	0.896422	0.81926	0.726995	0.628059	0.530148	0.438851	0.357418	0.287197	0.228352	0.180642	0.142142	0.111229	0.0865412	0.0669358	0.0514582	0.0393139	0.0298451	0.0225103	0.0168661	0.0125525	0.00927848	0.00681101	0.00496467	0.00359312	0.00258175	0.00184152	0.00130381	0.000916177	0.000638877	0.000442034	0.000303389	0.000206494	0.000139301	9.30641e-05	6.14862e-05	4.00753e-05	2.56557e-05	1.60035e-05	9.57285e-06	5.27928e-06	2.31579e-06	0	0	0	0
	Y data, Biofilm, b2/b10	1.25916	0.62958	0	0	0	0	0	0	0	0	0	0	0	0	0	0	0	0	0	0	0	0	0	0	0	0	0	0	0	0	0	0	0	0	0	0	0	0	0	0	0	0	0	0	0	0	0	0
4 Hr	Y data, Nutrient, c/c0	0.951793	0.952155	0.953292	0.955225	0.957946	0.961418	0.965582	0.970359	0.975657	0.981374	0.987408	0.993652	1	1	1	1	1	1	1	1	1	1	1	1	1	1	1	1	1	1	1	1	1	1	1	1	1	1	1	1	1	1	1	1	1	1	1	1
	Y data, Planktonic, b1/b10	0.286441	0.307847	0.316665	0.313201	0.2987	0.274845	0.243591	0.207006	0.167074	0.125488	0.0834587	0.0416045	0	0	0	0	0	0	0	0	0	0	0	0	0	0	0	0	0	0	0	0	0	0	0	0	0	0	0	0	0	0	0	0	0	0	0	0
	Y data, Autoinducer, a/a*	0.999996	0.978887	0.950884	0.913874	0.867039	0.810662	0.745925	0.674693	0.599318	0.52246	0.446959	0.375776	0.312018	0.259039	0.215022	0.178458	0.148089	0.122869	0.101928	0.0845432	0.0701128	0.0581367	0.0481989	0.0399537	0.0331139	0.0274408	0.0227361	0.0188349	0.0156005	0.0129193	0.0106969	0.00885504	0.00732879	0.00606422	0.0050166	0.00414885	0.00343019	0.0028351	0.00234242	0.00193462	0.00159714	0.00131794	0.001087	0.000896053	0.000738219	0.000607806	0.000500093	0.000411169
	Y data, Biofilm, b2/b10	2.14272	1.07136	0	0	0	0	0	0	0	0	0	0	0	0	0	0	0	0	0	0	0	0	0	0	0	0	0	0	0	0	0	0	0	0	0	0	0	0	0	0	0	0	0	0	0	0	0	0
20 Hr	Y data, Nutrient, c/c0	0.964385	0.964547	0.965092	0.966074	0.967532	0.969488	0.971946	0.974892	0.978294	0.982104	0.986259	0.990684	0.995295	1	1	1	1	1	1	1	1	1	1	1	1	1	1	1	1	1	1	1	1	1	1	1	1	1	1	1	1	1	1	1	1	1	1	1
	Y data, Planktonic, b1/b10	0.124407	0.151705	0.173719	0.189323	0.198009	0.199512	0.193821	0.181174	0.162046	0.137141	0.107357	0.0737598	0.0375463	0	0	0	0	0	0	0	0	0	0	0	0	0	0	0	0	0	0	0	0	0	0	0	0	0	0	0	0	0	0	0	0	0	0	0
	Y data, Autoinducer, a/a*	1	0.93066	0.872778	0.821451	0.772829	0.724059	0.673222	0.619279	0.562011	0.501951	0.440327	0.378986	0.320323	0.267206	0.222896	0.185934	0.1551	0.12938	0.107925	0.0900271	0.0750975	0.0626436	0.0522549	0.043589	0.0363601	0.0303301	0.0253	0.0211041	0.0176041	0.0146845	0.012249	0.0102175	0.00852292	0.00710935	0.00593022	0.00494664	0.00412619	0.00344182	0.00287094	0.00239475	0.00199754	0.00166621	0.00138983	0.00115929	0.000966989	0.00080658	0.000672776	0.000561164
	Y data, Biofilm, b2/b10	8.60274	4.30137	0	0	0	0	0	0	0	0	0	0	0	0	0	0	0	0	0	0	0	0	0	0	0	0	0	0	0	0	0	0	0	0	0	0	0	0	0	0	0	0	0	0	0	0	0	0
[truncated: 827 more columns]
