# Supplementary material for: A biophysical threshold for biofilm formation
Source: eLife. 2022 Jun 1;11:e76380. doi: 10.7554/eLife.76380 (PMC9302973; doi:10.7554/eLife.76380)
Supplement: Figure 3—source data 1. [file elife-76380-fig3-data1.xlsx]

## Sheet: Sheet1
All Times	X data, Position, x/x0	0	0.4	0.8	1.2	1.6	2	2.4	2.8	3.2	3.6	4	4.4	4.8	5.2	5.6	6	6.4	6.8	7.2	7.6	8	8.4	8.8	9.2	9.6	10	10.4	10.8	11.2	11.6	12	12.4	12.8	13.2	13.6	14	14.4	14.8	15.2	15.6	16	16.4	16.8	17.2	17.6	18	18.4	18.8
0 Hr	Y data, Nutrient, c/c0	1	1	1	1	1	1	1	1	1	1	1	1	1	1	1	1	1	1	1	1	1	1	1	1	1	1	1	1	1	1	1	1	1	1	1	1	1	1	1	1	1	1	1	1	1	1	1	1
	Y data, Planktonic, b1/b10	1	0.895025	0.641713	0.368567	0.169576	0.0625	0.018453	0.0043644	0.0008269	0.000125502	1.52588e-05	1.48614e-06	1.1595e-07	7.24684e-09	3.62827e-10	1.45519e-11	4.67532e-13	1.2033e-14	2.48088e-16	4.09739e-18	5.42101e-20	5.74544e-22	4.87795e-24	3.31758e-26	1.80749e-28	7.88861e-31	2.75801e-33	7.72434e-36	1.733e-38	3.11461e-41	4.48416e-44	5.17164e-47	4.77799e-50	3.53617e-53	2.09649e-56	9.95682e-60	3.78809e-63	1.15449e-66	2.81858e-70	5.51239e-74	8.63617e-78	1.08386e-81	1.08967e-85	8.77579e-90	5.66172e-94	2.92605e-98	1.21139e-102	4.01752e-107
	Y data, Autoinducer, a/a*	0	0	0	0	0	0	0	0	0	0	0	0	0	0	0	0	0	0	0	0	0	0	0	0	0	0	0	0	0	0	0	0	0	0	0	0	0	0	0	0	0	0	0	0	0	0	0	0
	Y data, Biofilm, b2/b10	0	0	0	0	0	0	0	0	0	0	0	0	0	0	0	0	0	0	0	0	0	0	0	0	0	0	0	0	0	0	0	0	0	0	0	0	0	0	0	0	0	0	0	0	0	0	0	0
4 Hr	Y data, Nutrient, c/c0	0.377597	0.377662	0.377857	0.378182	0.378636	0.37922	0.379934	0.380777	0.381748	0.382848	0.384076	0.385433	0.386916	0.388526	0.390263	0.392126	0.394114	0.396226	0.398462	0.400821	0.403303	0.405906	0.408631	0.411475	0.414438	0.417519	0.420717	0.424031	0.427461	0.431004	0.43466	0.438429	0.442307	0.446295	0.450392	0.454595	0.458904	0.463318	0.467834	0.472453	0.477172	0.481989	0.486905	0.491917	0.497023	0.502223	0.507515	0.512897
	Y data, Planktonic, b1/b10	0.0562769	0.0562685	0.0562433	0.0562013	0.0561425	0.0560671	0.0559749	0.0558662	0.055741	0.0555994	0.0554414	0.0552672	0.0550769	0.0548707	0.0546487	0.054411	0.0541578	0.0538893	0.0536058	0.0533072	0.052994	0.0526663	0.0523243	0.0519683	0.0515985	0.0512152	0.0508186	0.050409	0.0499866	0.0495518	0.0491049	0.0486461	0.0481757	0.0476941	0.0472015	0.0466984	0.0461849	0.0456615	0.0451284	0.044586	0.0440347	0.0434747	0.0429065	0.0423303	0.0417465	0.0411556	0.0405577	0.0399533
	Y data, Autoinducer, a/a*	0.227435	0.227395	0.227276	0.227079	0.226803	0.226448	0.226015	0.225504	0.224917	0.224252	0.223511	0.222695	0.221805	0.22084	0.219802	0.218693	0.217513	0.216262	0.214943	0.213556	0.212103	0.210585	0.209003	0.207359	0.205653	0.203888	0.202065	0.200186	0.198251	0.196263	0.194224	0.192134	0.189996	0.187811	0.185581	0.183308	0.180993	0.178639	0.176246	0.173817	0.171354	0.168858	0.166331	0.163774	0.161191	0.158582	0.155949	0.153294
	Y data, Biofilm, b2/b10	0	0	0	0	0	0	0	0	0	0	0	0	0	0	0	0	0	0	0	0	0	0	0	0	0	0	0	0	0	0	0	0	0	0	0	0	0	0	0	0	0	0	0	0	0	0	0	0
8 Hr	Y data, Nutrient, c/c0	0	0	0	0	0	0	0	0	0	5.69085e-06	0.000155877	0.000462118	0.000924519	0.00154291	0.00231703	0.00324657	0.00433116	0.0055704	0.00696385	0.008511	0.0102113	0.0120643	0.0140693	0.0162257	0.0185328	0.0209899	0.0235962	0.0263511	0.0292537	0.0323032	0.0354986	0.0388393	0.0423241	0.0459523	0.0497227	0.0536345	0.0576866	0.0618779	0.0662075	0.0706742	0.0752768	0.0800144	0.0848857	0.0898895	0.0950247	0.10029	0.105684	0.111206
	Y data, Planktonic, b1/b10	0.0622898	0.06229	0.0622908	0.0622922	0.0622941	0.0622967	0.0623001	0.0623042	0.0623093	0.0623167	0.0623121	0.0622945	0.0622623	0.0622144	0.06215	0.0620691	0.0619715	0.0618578	0.061728	0.0615827	0.0614222	0.0612468	0.061057	0.0608531	0.0606355	0.0604045	0.0601604	0.0599037	0.0596345	0.0593533	0.0590602	0.0587557	0.05844	0.0581133	0.057776	0.0574282	0.0570703	0.0567025	0.056325	0.055938	0.0555419	0.0551368	0.0547229	0.0543005	0.0538697	0.0534309	0.0529841	0.0525296
	Y data, Autoinducer, a/a*	0.132509	0.133254	0.135501	0.139283	0.144661	0.151733	0.160663	0.171715	0.185307	0.202016	0.214679	0.223741	0.23003	0.234239	0.236924	0.238518	0.239341	0.239623	0.239526	0.239161	0.238605	0.237908	0.237106	0.236221	0.235267	0.234254	0.233189	0.232075	0.230916	0.229713	0.228469	0.227183	0.225858	0.224494	0.223091	0.22165	0.220173	0.21866	0.217111	0.215528	0.21391	0.21226	0.210576	0.20886	0.207114	0.205336	0.203528	0.201692
	Y data, Biofilm, b2/b10	0	0	0	0	0	0	0	0	0	0	0	0	0	0	0	0	0	0	0	0	0	0	0	0	0	0	0	0	0	0	0	0	0	0	0	0	0	0	0	0	0	0	0	0	0	0	0	0
14 Hr	Y data, Nutrient, c/c0	0	0	0	0	0	0	0	0	0	0	0	0	0	0	0	0	0	0	0	0	0	0	0	0	0	0	0	0	0	0	0	0	0	0	0	0	0	0	0	0	0	0	0	0	0	0	0	0
	Y data, Planktonic, b1/b10	0.0636292	0.0636294	0.0636298	0.0636304	0.0636313	0.0636325	0.063634	0.0636357	0.0636377	0.06364	0.0636425	0.0636453	0.0636483	0.0636516	0.0636552	0.063659	0.063663	0.0636674	0.0636719	0.0636767	0.0636818	0.0636871	0.0636927	0.0636985	0.0637045	0.0637108	0.0637173	0.0637241	0.0637311	0.0637383	0.0637458	0.0637534	0.0637614	0.0637695	0.0637779	0.0637866	0.0637955	0.0638046	0.0638139	0.0638235	0.0638333	0.0638433	0.0638534	0.0638636	0.0638739	0.0638841	0.0638943	0.0639043
	Y data, Autoinducer, a/a*	0.000547339	0.000551677	0.000564759	0.000586792	0.000618126	0.000659257	0.000710837	0.000773682	0.000848788	0.000937345	0.00104076	0.00116066	0.00129895	0.00145782	0.00163979	0.00184773	0.00208494	0.00235518	0.00266271	0.00301241	0.00340982	0.00386122	0.00437375	0.00495552	0.00561575	0.00636486	0.00721472	0.00817876	0.00927224	0.0105124	0.011919	0.0135141	0.0153229	0.0173742	0.0197002	0.0223378	0.0253286	0.0287199	0.0325653	0.0369255	0.0418688	0.0474729	0.0538253	0.0610263	0.0691921	0.0784598	0.0889924	0.100975
	Y data, Biofilm, b2/b10	0	0	0	0	0	0	0	0	0	0	0	0	0	0	0	0	0	0	0	0	0	0	0	0	0	0	0	0	0	0	0	0	0	0	0	0	0	0	0	0	0	0	0	0	0	0	0	0
20 Hr	Y data, Nutrient, c/c0	0	0	0	0	0	0	0	0	0	0	0	0	0	0	0	0	0	0	0	0	0	0	0	0	0	0	0	0	0	0	0	0	0	0	0	0	0	0	0	0	0	0	0	0	0	0	0	0
	Y data, Planktonic, b1/b10	0.0641344	0.0641344	0.0641346	0.0641349	0.0641352	0.0641357	0.0641363	0.0641371	0.0641379	0.0641388	0.0641399	0.064141	0.0641423	0.0641437	0.0641451	0.0641467	0.0641484	0.0641502	0.0641521	0.0641542	0.0641563	0.0641585	0.0641608	0.0641633	0.0641658	0.0641684	0.0641712	0.064174	0.064177	0.06418	0.0641832	0.0641864	0.0641897	0.0641932	0.0641967	0.0642003	0.064204	0.0642079	0.0642118	0.0642158	0.0642198	0.064224	0.0642283	0.0642326	0.0642371	0.0642416	0.0642462	0.0642509
	Y data, Autoinducer, a/a*	2.79907e-06	2.82115e-06	2.88773e-06	2.99985e-06	3.15929e-06	3.36856e-06	3.63095e-06	3.95061e-06	4.33256e-06	4.78284e-06	5.30853e-06	5.91791e-06	6.6206e-06	7.42767e-06	8.35182e-06	9.40763e-06	1.06117e-05	1.19831e-05	1.35433e-05	1.5317e-05	1.73321e-05	1.96203e-05	2.22176e-05	2.51651e-05	2.85091e-05	3.23023e-05	3.66045e-05	4.14833e-05	4.70157e-05	5.32888e-05	6.04014e-05	6.84655e-05	7.76081e-05	8.79731e-05	9.97239e-05	0.000113045	0.000128147	0.000145268	0.000164676	0.000186678	0.000211619	0.000239894	0.000271946	0.000308281	0.000349471	0.000396163	0.000449094	0.000509097
	Y data, Biofilm, b2/b10	0	0	0	0	0	0	0	0	0	0	0	0	0	0	0	0	0	0	0	0	0	0	0	0	0	0	0	0	0	0	0	0	0	0	0	0	0	0	0	0	0	0	0	0	0	0	0	0
[truncated: 827 more columns]
