# Supplementary material for: A biophysical threshold for biofilm formation
Source: eLife. 2022 Jun 1;11:e76380. doi: 10.7554/eLife.76380 (PMC9302973; doi:10.7554/eLife.76380)
Supplement: Figure 4—figure supplement 1—source data 1. [file elife-76380-fig4-figsupp1-data1.xlsx]

## Sheet: Fig S1 A
X Data, Nutrient Availability Parameter, D	Y Data, Dispersal Parameter, J	Z Data, Fraction biofilm, f
0.0147911	788.255	0.599648
0.0323594	788.255	1
0.0707946	788.255	0.427706
0.154882	788.255	0.452208
0.338844	788.255	0.607873
0.74131	788.255	0.999241
1.62181	788.255	0.799495
3.54813	788.255	0.999508
7.76247	788.255	0.99844
16.9824	788.255	1
37.1535	788.255	0.999804
81.2831	788.255	1
177.828	788.255	0.98554
389.045	788.255	0.999597
851.138	788.255	0.998444
0.0147911	309.03	0.684775
0.0323594	309.03	0.305198
0.0707946	309.03	0.833333
0.154882	309.03	0.589155
0.338844	309.03	0.794306
0.74131	309.03	0.998763
1.62181	309.03	0.966178
3.54813	309.03	0.999962
7.76247	309.03	0.999954
16.9824	309.03	0.999019
37.1535	309.03	0.999999
81.2831	309.03	1
177.828	309.03	1
389.045	309.03	0.997898
851.138	309.03	1
0.0147911	121.153	0.882839
0.0323594	121.153	0.636187
0.0707946	121.153	0.999992
0.154882	121.153	0.773876
0.338844	121.153	1
0.74131	121.153	0.933333
1.62181	121.153	0.999638
3.54813	121.153	0.999479
7.76247	121.153	0.999578
16.9824	121.153	1
37.1535	121.153	1
81.2831	121.153	0.999934
177.828	121.153	0.999826
389.045	121.153	0.999778
851.138	121.153	1
0.0147911	47.4971	0.809916
0.0323594	47.4971	0.28
0.0707946	47.4971	0.999294
0.154882	47.4971	0.758722
0.338844	47.4971	0.769231
0.74131	47.4971	0.996646
1.62181	47.4971	1
3.54813	47.4971	1
7.76247	47.4971	0.999851
16.9824	47.4971	0.975039
37.1535	47.4971	0.860465
81.2831	47.4971	0.988149
177.828	47.4971	1
389.045	47.4971	0.872889
851.138	47.4971	0.974339
0.0147911	18.6209	0.760846
0.0323594	18.6209	0.374995
0.0707946	18.6209	0.69601
0.154882	18.6209	0.331372
0.338844	18.6209	0.5
0.74131	18.6209	0.0833333
1.62181	18.6209	0.996586
3.54813	18.6209	0.886365
7.76247	18.6209	1
16.9824	18.6209	0.707991
37.1535	18.6209	0
81.2831	18.6209	0.998496
177.828	18.6209	0.98448
389.045	18.6209	0.999406
851.138	18.6209	0.762576
0.0147911	7.30018	0.423786
0.0323594	7.30018	0.5
0.0707946	7.30018	0.830224
0.154882	7.30018	0.142857
0.338844	7.30018	0.365385
0.74131	7.30018	0.986232
1.62181	7.30018	0.721008
3.54813	7.30018	0.998528
7.76247	7.30018	0.868332
16.9824	7.30018	0.75
37.1535	7.30018	0.25
81.2831	7.30018	0.995009
177.828	7.30018	0.928571
389.045	7.30018	0.966245
851.138	7.30018	0.94564
0.0147911	2.86198	0.54106
0.0323594	2.86198	0.555791
0.0707946	2.86198	0.460659
0.154882	2.86198	0.392504
0.338844	2.86198	0.5
0.74131	2.86198	0.884646
1.62181	2.86198	0.15668
3.54813	2.86198	0.775691
7.76247	2.86198	0.698267
16.9824	2.86198	0.998671
37.1535	2.86198	0.2
81.2831	2.86198	0.990955
177.828	2.86198	0.702756
389.045	2.86198	0.999994
851.138	2.86198	0.999977
0.0147911	1.12202	0.334276
0.0323594	1.12202	0.815493
0.0707946	1.12202	0.840907
0.154882	1.12202	0.431402
0.338844	1.12202	0
0.74131	1.12202	0.927815
1.62181	1.12202	0
3.54813	1.12202	0.230769
7.76247	1.12202	0.814215
16.9824	1.12202	0.314438
37.1535	1.12202	0.521132
81.2831	1.12202	0.383931
177.828	1.12202	0.42348
389.045	1.12202	0.814647
851.138	1.12202	0.927103
0.0147911	0.439879	0.785947
0.0323594	0.439879	0.23647
0.0707946	0.439879	0
0.154882	0.439879	0.4
0.338844	0.439879	0.857143
0.74131	0.439879	0.275017
1.62181	0.439879	0
3.54813	0.439879	1
7.76247	0.439879	0.496498
16.9824	0.439879	0.214292
37.1535	0.439879	0.311532
81.2831	0.439879	0.475355
177.828	0.439879	0.838289
389.045	0.439879	0.904311
851.138	0.439879	0.928468
0.0147911	0.172451	0.124612
0.0323594	0.172451	0.22001
0.0707946	0.172451	0
0.154882	0.172451	0
0.338844	0.172451	0.03125
0.74131	0.172451	0.457821
1.62181	0.172451	0.25263
3.54813	0.172451	0.258151
7.76247	0.172451	0
16.9824	0.172451	0
37.1535	0.172451	0
81.2831	0.172451	0.274604
177.828	0.172451	0.200837
389.045	0.172451	0.499843
851.138	0.172451	0.8
0.0147911	0.0676083	0
0.0323594	0.0676083	0.0737389
0.0707946	0.0676083	0
0.154882	0.0676083	0
0.338844	0.0676083	0
0.74131	0.0676083	0.2
1.62181	0.0676083	0.149598
3.54813	0.0676083	0.0882006
7.76247	0.0676083	0.0782846
16.9824	0.0676083	0.00728518
37.1535	0.0676083	0
81.2831	0.0676083	0.0099211
177.828	0.0676083	0
389.045	0.0676083	0
851.138	0.0676083	0
0.0147911	0.0265053	0
0.0323594	0.0265053	0
0.0707946	0.0265053	0.0212762
0.154882	0.0265053	0.120065
0.338844	0.0265053	0
0.74131	0.0265053	0
1.62181	0.0265053	0
3.54813	0.0265053	0.198129
7.76247	0.0265053	0
16.9824	0.0265053	0
37.1535	0.0265053	0
81.2831	0.0265053	0.0204075
177.828	0.0265053	0
389.045	0.0265053	0.0568779
851.138	0.0265053	0
0.0147911	0.0103912	0
0.0323594	0.0103912	0
0.0707946	0.0103912	0
0.154882	0.0103912	0.00813911
0.338844	0.0103912	0
0.74131	0.0103912	0
1.62181	0.0103912	0
3.54813	0.0103912	0
7.76247	0.0103912	0.0113698
16.9824	0.0103912	0
37.1535	0.0103912	0
81.2831	0.0103912	0.142446
177.828	0.0103912	0.0314098
389.045	0.0103912	0.0926901
851.138	0.0103912	0
0.0147911	0.0040738	0
0.0323594	0.0040738	0
0.0707946	0.0040738	0.00101739
0.154882	0.0040738	0.00117
0.338844	0.0040738	0.00122341
0.74131	0.0040738	0
1.62181	0.0040738	0
3.54813	0.0040738	0
7.76247	0.0040738	0.0075958
16.9824	0.0040738	0.098208
37.1535	0.0040738	0
81.2831	0.0040738	0
177.828	0.0040738	0
389.045	0.0040738	0
851.138	0.0040738	0
0.0147911	0.0015971	0
0.0323594	0.0015971	0
0.0707946	0.0015971	0.000203478
0.154882	0.0015971	0.000478173
0.338844	0.0015971	0
0.74131	0.0015971	0
1.62181	0.0015971	0
3.54813	0.0015971	0
7.76247	0.0015971	0.0560825
16.9824	0.0015971	0
37.1535	0.0015971	0
81.2831	0.0015971	0
177.828	0.0015971	0
389.045	0.0015971	0
851.138	0.0015971	0

## Sheet: Fig S2 B
X Data, Nutrient Availability Parameter, D	Y Data, Dispersal Parameter, J	Z Data, Fraction biofilm standard deviation, σf
0.0147911	788.255	0.00272562
0.0323594	788.255	0
0.0707946	788.255	0
0.154882	788.255	0
0.338844	788.255	0
0.74131	788.255	0.00207572
1.62181	788.255	0
3.54813	788.255	0.00248337
7.76247	788.255	0.00244579
16.9824	788.255	0
37.1535	788.255	0
81.2831	788.255	0
177.828	788.255	0
389.045	788.255	0.000946981
851.138	788.255	0.00216425
0.0147911	309.03	0.698265
0.0323594	309.03	0.109232
0.0707946	309.03	0.389249
0.154882	309.03	0
0.338844	309.03	0
0.74131	309.03	0.0018779
1.62181	309.03	0
3.54813	309.03	0.000199989
7.76247	309.03	0.000527625
16.9824	309.03	0.00283243
37.1535	309.03	1.12566e-06
81.2831	309.03	0
177.828	309.03	0
389.045	309.03	0.0984465
851.138	309.03	0
0.0147911	121.153	0.209706
0.0323594	121.153	0.186513
0.0707946	121.153	1.68585e-05
0.154882	121.153	0
0.338844	121.153	0
0.74131	121.153	0.258199
1.62181	121.153	0.000919231
3.54813	121.153	0.00173736
7.76247	121.153	0.00113302
16.9824	121.153	0
37.1535	121.153	4.28419e-07
81.2831	121.153	0.000102042
177.828	121.153	0.000281386
389.045	121.153	0.000323432
851.138	121.153	0
0.0147911	47.4971	0.390713
0.0323594	47.4971	0.458258
0.0707946	47.4971	0.00274845
0.154882	47.4971	0
0.338844	47.4971	0.429669
0.74131	47.4971	0.00653995
1.62181	47.4971	0
3.54813	47.4971	0
7.76247	47.4971	0.00041341
16.9824	47.4971	0.00703407
37.1535	47.4971	0.350605
81.2831	47.4971	0.0178134
177.828	47.4971	0
389.045	47.4971	4.3612e-05
851.138	47.4971	0
0.0147911	18.6209	0.414409
0.0323594	18.6209	0.489239
0.0707946	18.6209	0.442284
0.154882	18.6209	0.471439
0.338844	18.6209	0.522233
0.74131	18.6209	0.278325
1.62181	18.6209	0.0123099
3.54813	18.6209	0.319729
7.76247	18.6209	0
16.9824	18.6209	0.456085
37.1535	18.6209	0
81.2831	18.6209	0.00285412
177.828	18.6209	0
389.045	18.6209	0.000869836
851.138	18.6209	0.000328473
0.0147911	7.30018	0.464587
0.0323594	7.30018	0.527046
0.0707946	7.30018	0.359629
0.154882	7.30018	0.356348
0.338844	7.30018	0.486236
0.74131	7.30018	0.0203992
1.62181	7.30018	0
3.54813	7.30018	0.00316679
7.76247	7.30018	0.33815
16.9824	7.30018	0.437595
37.1535	7.30018	0.46291
81.2831	7.30018	0.00840838
177.828	7.30018	0.262265
389.045	7.30018	0.0825078
851.138	7.30018	0
0.0147911	2.86198	0.494633
0.0323594	2.86198	0.498354
0.0707946	2.86198	0
0.154882	2.86198	0
0.338844	2.86198	0.527046
0.74131	2.86198	0.320456
1.62181	2.86198	0.245503
3.54813	2.86198	0.42051
7.76247	2.86198	0.462538
16.9824	2.86198	0.00444142
37.1535	2.86198	0.414039
81.2831	2.86198	0.0348431
177.828	2.86198	0.464698
389.045	2.86198	2.75263e-05
851.138	2.86198	3.62137e-05
0.0147911	1.12202	0.463177
0.0323594	1.12202	0.371904
0.0707946	1.12202	0.369989
0.154882	1.12202	0
0.338844	1.12202	0
0.74131	1.12202	0.251047
1.62181	1.12202	0
3.54813	1.12202	0.429669
7.76247	1.12202	0.392111
16.9824	1.12202	0.442544
37.1535	1.12202	0.502086
81.2831	1.12202	0.495258
177.828	1.12202	0.507481
389.045	1.12202	0.368264
851.138	1.12202	0.261871
0.0147911	0.439879	0.398191
0.0323594	0.439879	0.406985
0.0707946	0.439879	0
0.154882	0.439879	0.502625
0.338844	0.439879	0.377964
0.74131	0.439879	0.443888
1.62181	0.439879	0
3.54813	0.439879	0
7.76247	0.439879	0.507208
16.9824	0.439879	0.384074
37.1535	0.439879	0.454823
81.2831	0.439879	0.484837
177.828	0.439879	0.364761
389.045	0.439879	0.191011
851.138	0.439879	0.262236
0.0147911	0.172451	0.304197
0.0323594	0.172451	0.240351
0.0707946	0.172451	0
0.154882	0.172451	0
0.338844	0.172451	0.176777
0.74131	0.172451	0.470826
1.62181	0.172451	0
3.54813	0.172451	0
7.76247	0.172451	0
16.9824	0.172451	0
37.1535	0.172451	0
81.2831	0.172451	0.439993
177.828	0.172451	0.399909
389.045	0.172451	0.509015
851.138	0.172451	0.406838
0.0147911	0.0676083	0
0.0323594	0.0676083	0.26587
0.0707946	0.0676083	0
0.154882	0.0676083	0
0.338844	0.0676083	0
0.74131	0.0676083	0.403687
1.62181	0.0676083	0
3.54813	0.0676083	0.287789
7.76247	0.0676083	0.268219
16.9824	0.0676083	0.0333754
37.1535	0.0676083	0
81.2831	0.0676083	0.0992097
177.828	0.0676083	0
389.045	0.0676083	0
851.138	0.0676083	0
0.0147911	0.0265053	0
0.0323594	0.0265053	0
0.0707946	0.0265053	0.145862
0.154882	0.0265053	0.321025
0.338844	0.0265053	0
0.74131	0.0265053	0
1.62181	0.0265053	0
3.54813	0.0265053	0.406552
7.76247	0.0265053	0
16.9824	0.0265053	0
37.1535	0.0265053	0
81.2831	0.0265053	0.135359
177.828	0.0265053	0
389.045	0.0265053	0.230933
851.138	0.0265053	0
0.0147911	0.0103912	0
0.0323594	0.0103912	0
0.0707946	0.0103912	0
0.154882	0.0103912	0.0767843
0.338844	0.0103912	0
0.74131	0.0103912	0
1.62181	0.0103912	0
3.54813	0.0103912	0
7.76247	0.0103912	0.105437
16.9824	0.0103912	0
37.1535	0.0103912	0
81.2831	0.0103912	0.353152
177.828	0.0103912	0.170575
389.045	0.0103912	0.273938
851.138	0.0103912	0
0.0147911	0.0040738	0
0.0323594	0.0040738	0
0.0707946	0.0040738	0
0.154882	0.0040738	0
0.338844	0.0040738	0
0.74131	0.0040738	0
1.62181	0.0040738	0
3.54813	0.0040738	0
7.76247	0.0040738	0.0844118
16.9824	0.0040738	0.291838
37.1535	0.0040738	0
81.2831	0.0040738	0
177.828	0.0040738	0
389.045	0.0040738	0
851.138	0.0040738	0
0.0147911	0.0015971	0
0.0323594	0.0015971	0
0.0707946	0.0015971	0
0.154882	0.0015971	0
0.338844	0.0015971	0
0.74131	0.0015971	0
1.62181	0.0015971	0
3.54813	0.0015971	0
7.76247	0.0015971	0.220682
16.9824	0.0015971	0
37.1535	0.0015971	0
81.2831	0.0015971	0
177.828	0.0015971	0
389.045	0.0015971	0
851.138	0.0015971	0
