# Supplementary material for: A biophysical threshold for biofilm formation
Source: eLife. 2022 Jun 1;11:e76380. doi: 10.7554/eLife.76380 (PMC9302973; doi:10.7554/eLife.76380)
Supplement: Figure 4—figure supplement 2—source data 1. [file elife-76380-fig4-figsupp2-data1.xlsx]

## Sheet: Fig S5 A
X Data, Spatial Step Size, dx [um]	X Data, Temporal Step Size, dt [s]	Y Data, Fraction biofilm, f
200	10	0
100	2.5	0
40	0.4	0
20	0.1	0
10	0.025	0
5	0.00625	0

## Sheet: Fig S5 B
X Data, Spatial Step Size, dx [um]	X Data, Temporal Step Size, dt [s]	Y Data, Fraction biofilm, f
200	10	0.797698
100	2.5	0.662762
40	0.4	0.675628
20	0.1	0.927295
10	0.025	0.998062
5	0.00625	1
