# Supplementary material for: A biophysical threshold for biofilm formation
Source: eLife. 2022 Jun 1;11:e76380. doi: 10.7554/eLife.76380 (PMC9302973; doi:10.7554/eLife.76380)
Supplement: Figure 4—source data 1. [file elife-76380-fig4-data1.xlsx]

## Sheet: Fig 4A
X Data, Nutrient Availability Parameter, D	Y Data, Dispersal Parameter, J	Z Data, Fraction biofilm, f
0.0147911	788.255	0
0.0323594	788.255	0
0.0707946	788.255	0
0.154882	788.255	0.0255556
0.338844	788.255	0
0.74131	788.255	0.971716
1.62181	788.255	0.953021
3.54813	788.255	0.999508
7.76247	788.255	0.998522
16.9824	788.255	1
37.1535	788.255	0.999803
81.2831	788.255	1
177.828	788.255	0.998087
389.045	788.255	0.999634
851.138	788.255	0.998856
0.0147911	309.03	0
0.0323594	309.03	0
0.0707946	309.03	0
0.154882	309.03	0.0809233
0.338844	309.03	0.111111
0.74131	309.03	0.877436
1.62181	309.03	0.939393
3.54813	309.03	0.999962
7.76247	309.03	0.999954
16.9824	309.03	0.999019
37.1535	309.03	0.999998
81.2831	309.03	1
177.828	309.03	1
389.045	309.03	0.999512
851.138	309.03	1
0.0147911	121.153	0
0.0323594	121.153	0
0.0707946	121.153	0
0.154882	121.153	0.200903
0.338844	121.153	0.489587
0.74131	121.153	0.714286
1.62181	121.153	0.999719
3.54813	121.153	0.999495
7.76247	121.153	0.999578
16.9824	121.153	1
37.1535	121.153	1
81.2831	121.153	1
177.828	121.153	0.999736
389.045	121.153	0.999779
851.138	121.153	1
0.0147911	47.4971	0
0.0323594	47.4971	0
0.0707946	47.4971	0.06
0.154882	47.4971	0.545455
0.338844	47.4971	0.501839
0.74131	47.4971	0.995917
1.62181	47.4971	0.973145
3.54813	47.4971	1
7.76247	47.4971	0.999851
16.9824	47.4971	0.975038
37.1535	47.4971	1
81.2831	47.4971	0.987744
177.828	47.4971	1
389.045	47.4971	0.992559
851.138	47.4971	0.998027
0.0147911	18.6209	0
0.0323594	18.6209	0
0.0707946	18.6209	0.0212766
0.154882	18.6209	0.025641
0.338844	18.6209	0.333333
0.74131	18.6209	0.69378
1.62181	18.6209	0.999998
3.54813	18.6209	0.886364
7.76247	18.6209	1
16.9824	18.6209	0.991187
37.1535	18.6209	0.839271
81.2831	18.6209	0.998523
177.828	18.6209	0.96909
389.045	18.6209	0.999325
851.138	18.6209	0.998471
0.0147911	7.30018	0
0.0323594	7.30018	0
0.0707946	7.30018	0
0.154882	7.30018	0
0.338844	7.30018	0.590909
0.74131	7.30018	0.435672
1.62181	7.30018	0.797137
3.54813	7.30018	0.998548
7.76247	7.30018	0.868332
16.9824	7.30018	0.666667
37.1535	7.30018	0.1
81.2831	7.30018	0.995009
177.828	7.30018	0.928385
389.045	7.30018	0.970943
851.138	7.30018	0.993398
0.0147911	2.86198	0.346852
0.0323594	2.86198	0
0.0707946	2.86198	0
0.154882	2.86198	0.20957
0.338844	2.86198	0
0.74131	2.86198	0.852581
1.62181	2.86198	0.722662
3.54813	2.86198	0.872653
7.76247	2.86198	0.698268
16.9824	2.86198	0.954285
37.1535	2.86198	0.230571
81.2831	2.86198	0.990955
177.828	2.86198	0.702756
389.045	2.86198	0.999994
851.138	2.86198	0.998258
0.0147911	1.12202	0
0.0323594	1.12202	0
0.0707946	1.12202	0.679245
0.154882	1.12202	0.161059
0.338844	1.12202	0.323533
0.74131	1.12202	0.954477
1.62181	1.12202	0.61421
3.54813	1.12202	0.26666
7.76247	1.12202	0.814212
16.9824	1.12202	0.314435
37.1535	1.12202	0.510232
81.2831	1.12202	0.382977
177.828	1.12202	0.42348
389.045	1.12202	0.795956
851.138	1.12202	0.95464
0.0147911	0.439879	0
0.0323594	0.439879	0.0886534
0.0707946	0.439879	0
0.154882	0.439879	0.16593
0.338844	0.439879	0
0.74131	0.439879	0.244649
1.62181	0.439879	0
3.54813	0.439879	1
7.76247	0.439879	0.496498
16.9824	0.439879	0.214287
37.1535	0.439879	0.30699
81.2831	0.439879	0.475313
177.828	0.439879	0.832692
389.045	0.439879	0.793809
851.138	0.439879	0.950089
0.0147911	0.172451	0.0193691
0.0323594	0.172451	0.0146447
0.0707946	0.172451	0
0.154882	0.172451	0.0619042
0.338844	0.172451	0.206698
0.74131	0.172451	0.763037
1.62181	0.172451	0.354123
3.54813	0.172451	0.2824
7.76247	0.172451	0
16.9824	0.172451	0
37.1535	0.172451	0
81.2831	0.172451	0.284477
177.828	0.172451	0.215188
389.045	0.172451	0.499843
851.138	0.172451	0.75
0.0147911	0.0676083	0.00629496
0.0323594	0.0676083	0.00549096
0.0707946	0.0676083	0.00439481
0.154882	0.0676083	0
0.338844	0.0676083	0.164706
0.74131	0.0676083	0.266194
1.62181	0.0676083	0.242167
3.54813	0.0676083	0.0881297
7.76247	0.0676083	0.0782844
16.9824	0.0676083	0.00728286
37.1535	0.0676083	0
81.2831	0.0676083	0.0099211
177.828	0.0676083	0
389.045	0.0676083	0
851.138	0.0676083	0
0.0147911	0.0265053	0.00156163
0.0323594	0.0265053	0.00196011
0.0707946	0.0265053	0.00159905
0.154882	0.0265053	0.0198157
0.338844	0.0265053	0
0.74131	0.0265053	0
1.62181	0.0265053	0
3.54813	0.0265053	0.195947
7.76247	0.0265053	0
16.9824	0.0265053	0
37.1535	0.0265053	0
81.2831	0.0265053	0.0204074
177.828	0.0265053	0
389.045	0.0265053	0.0568779
851.138	0.0265053	0
0.0147911	0.0103912	0.000350157
0.0323594	0.0103912	0.000541947
0.0707946	0.0103912	0.000573826
0.154882	0.0103912	0.00277478
0.338844	0.0103912	0
0.74131	0.0103912	0
1.62181	0.0103912	0
3.54813	0.0103912	0
7.76247	0.0103912	0.0113695
16.9824	0.0103912	0
37.1535	0.0103912	0
81.2831	0.0103912	0.138791
177.828	0.0103912	0.0314098
389.045	0.0103912	0.0926901
851.138	0.0103912	0
0.0147911	0.0040738	0
0.0323594	0.0040738	0.000122299
0.0707946	0.0040738	0.000173233
0.154882	0.0040738	0.000451779
0.338844	0.0040738	0.000421072
0.74131	0.0040738	0
1.62181	0.0040738	0
3.54813	0.0040738	0
7.76247	0.0040738	0.00759482
16.9824	0.0040738	0.0982069
37.1535	0.0040738	0
81.2831	0.0040738	0
177.828	0.0040738	0
389.045	0.0040738	0
851.138	0.0040738	0
0.0147911	0.0015971	0
0.0323594	0.0015971	2.74273e-05
0.0707946	0.0015971	7.04074e-05
0.154882	0.0015971	0.000142018
0.338844	0.0015971	0
0.74131	0.0015971	0
1.62181	0.0015971	0
3.54813	0.0015971	0
7.76247	0.0015971	0.0560653
16.9824	0.0015971	0
37.1535	0.0015971	0
81.2831	0.0015971	0
177.828	0.0015971	0
389.045	0.0015971	0
851.138	0.0015971	0

## Sheet: Fig 4B
X Data, Nutrient Availability Parameter, D	Y Data, Dispersal Parameter, J	Z Data, Fraction biofilm standard deviation, σf
0.0147911	788.255	0
0.0323594	788.255	0
0.0707946	788.255	0
0.154882	788.255	0
0.338844	788.255	0
0.74131	788.255	0.166589
1.62181	788.255	0
3.54813	788.255	0.00248337
7.76247	788.255	0.0024037
16.9824	788.255	0
37.1535	788.255	0.000628575
81.2831	788.255	0
177.828	788.255	0.0040328
389.045	788.255	0.00090853
851.138	788.255	0.00197419
0.0147911	309.03	0
0.0323594	309.03	0
0.0707946	309.03	0
0.154882	309.03	0
0.338844	309.03	0.333333
0.74131	309.03	0.329608
1.62181	309.03	0
3.54813	309.03	0.000200602
7.76247	309.03	0.000527623
16.9824	309.03	0.00283243
37.1535	309.03	1.91595e-06
81.2831	309.03	0
177.828	309.03	5.64136e-12
389.045	309.03	0.103756
851.138	309.03	0
0.0147911	121.153	0
0.0323594	121.153	0
0.0707946	121.153	0
0.154882	121.153	0
0.338844	121.153	0
0.74131	121.153	0.468807
1.62181	121.153	0.000818594
3.54813	121.153	0.00171334
7.76247	121.153	0.00113302
16.9824	121.153	0
37.1535	121.153	4.28419e-07
81.2831	121.153	4.53247e-17
177.828	121.153	0.000281933
389.045	121.153	0.000321452
851.138	121.153	0
0.0147911	47.4971	0
0.0323594	47.4971	0
0.0707946	47.4971	0.239898
0.154882	47.4971	0.522233
0.338844	47.4971	0
0.74131	47.4971	0.00702703
1.62181	47.4971	0.0712563
3.54813	47.4971	0
7.76247	47.4971	0.000413517
16.9824	47.4971	0.00703407
37.1535	47.4971	6.6422e-11
81.2831	47.4971	0.0180335
177.828	47.4971	0
389.045	47.4971	4.36128e-05
851.138	47.4971	0
0.0147911	18.6209	0
0.0323594	18.6209	0
0.0707946	18.6209	0.145865
0.154882	18.6209	0.160128
0.338844	18.6209	0.516398
0.74131	18.6209	0
1.62181	18.6209	8.74489e-06
3.54813	18.6209	0.319729
7.76247	18.6209	6.71065e-09
16.9824	18.6209	0.0111162
37.1535	18.6209	0
81.2831	18.6209	0.00262628
177.828	18.6209	0
389.045	18.6209	0.000888592
851.138	18.6209	0.00202111
0.0147911	7.30018	0
0.0323594	7.30018	0
0.0707946	7.30018	0
0.154882	7.30018	0
0.338844	7.30018	0.503236
0.74131	7.30018	0.510227
1.62181	7.30018	0
3.54813	7.30018	0.00314893
7.76247	7.30018	0.33815
16.9824	7.30018	0.475831
37.1535	7.30018	0.307794
81.2831	7.30018	0.00840806
177.828	7.30018	0.262213
389.045	7.30018	0.0771252
851.138	7.30018	0
0.0147911	2.86198	0.485621
0.0323594	2.86198	0
0.0707946	2.86198	0
0.154882	2.86198	0
0.338844	2.86198	0
0.74131	2.86198	0.356045
1.62181	2.86198	0
3.54813	2.86198	0.335115
7.76247	2.86198	0.462538
16.9824	2.86198	0.208177
37.1535	2.86198	0.438153
81.2831	2.86198	0.0348431
177.828	2.86198	0.464698
389.045	2.86198	2.75263e-05
851.138	2.86198	0.00365063
0.0147911	1.12202	0
0.0323594	1.12202	0
0.0707946	1.12202	0.471233
0.154882	1.12202	0
0.338844	1.12202	0
0.74131	1.12202	0.203698
1.62181	1.12202	0
3.54813	1.12202	0.449766
7.76247	1.12202	0.392109
16.9824	1.12202	0.442543
37.1535	1.12202	0.502334
81.2831	1.12202	0.49404
177.828	1.12202	0.507481
389.045	1.12202	0.360311
851.138	1.12202	0.199106
0.0147911	0.439879	0
0.0323594	0.439879	0
0.0707946	0.439879	0
0.154882	0.439879	0
0.338844	0.439879	0
0.74131	0.439879	0.425276
1.62181	0.439879	0
3.54813	0.439879	0
7.76247	0.439879	0.507208
16.9824	0.439879	0.384072
37.1535	0.439879	0.448354
81.2831	0.439879	0.484792
177.828	0.439879	0.35156
389.045	0.439879	0.31794
851.138	0.439879	0.217832
0.0147911	0.172451	0
0.0323594	0.172451	0
0.0707946	0.172451	0
0.154882	0.172451	0
0.338844	0.172451	0
0.74131	0.172451	0.358937
1.62181	0.172451	0
3.54813	0.172451	0
7.76247	0.172451	0
16.9824	0.172451	0
37.1535	0.172451	0
81.2831	0.172451	0.444221
177.828	0.172451	0.405101
389.045	0.172451	0.509015
851.138	0.172451	0.439941
0.0147911	0.0676083	0
0.0323594	0.0676083	0
0.0707946	0.0676083	0
0.154882	0.0676083	0
0.338844	0.0676083	0
0.74131	0.0676083	0.446421
1.62181	0.0676083	0
3.54813	0.0676083	0.287558
7.76247	0.0676083	0.268218
16.9824	0.0676083	0.0333648
37.1535	0.0676083	0
81.2831	0.0676083	0.0992097
177.828	0.0676083	0
389.045	0.0676083	0
851.138	0.0676083	0
0.0147911	0.0265053	0
0.0323594	0.0265053	0
0.0707946	0.0265053	0
0.154882	0.0265053	0
0.338844	0.0265053	0
0.74131	0.0265053	0
1.62181	0.0265053	0
3.54813	0.0265053	0.40208
7.76247	0.0265053	0
16.9824	0.0265053	0
37.1535	0.0265053	0
81.2831	0.0265053	0.135359
177.828	0.0265053	0
389.045	0.0265053	0.230933
851.138	0.0265053	0
0.0147911	0.0103912	0
0.0323594	0.0103912	0
0.0707946	0.0103912	0
0.154882	0.0103912	0
0.338844	0.0103912	0
0.74131	0.0103912	0
1.62181	0.0103912	0
3.54813	0.0103912	0
7.76247	0.0103912	0.105434
16.9824	0.0103912	0
37.1535	0.0103912	0
81.2831	0.0103912	0.344325
177.828	0.0103912	0.170575
389.045	0.0103912	0.273938
851.138	0.0103912	0
0.0147911	0.0040738	0
0.0323594	0.0040738	0
0.0707946	0.0040738	0
0.154882	0.0040738	0
0.338844	0.0040738	0
0.74131	0.0040738	0
1.62181	0.0040738	0
3.54813	0.0040738	0
7.76247	0.0040738	0.0844009
16.9824	0.0040738	0.291835
37.1535	0.0040738	0
81.2831	0.0040738	0
177.828	0.0040738	0
389.045	0.0040738	0
851.138	0.0040738	0
0.0147911	0.0015971	0
0.0323594	0.0015971	0
0.0707946	0.0015971	0
0.154882	0.0015971	0
0.338844	0.0015971	0
0.74131	0.0015971	0
1.62181	0.0015971	0
3.54813	0.0015971	0
7.76247	0.0015971	0.220615
16.9824	0.0015971	0
37.1535	0.0015971	0
81.2831	0.0015971	0
177.828	0.0015971	0
389.045	0.0015971	0
851.138	0.0015971	0
