# Supplementary material for: A biophysical threshold for biofilm formation
Source: eLife. 2022 Jun 1;11:e76380. doi: 10.7554/eLife.76380 (PMC9302973; doi:10.7554/eLife.76380)
Supplement: Figure 4—source data 2. [file elife-76380-fig4-data2.xlsx]

## Sheet: Bar Graph (i)
Simulation Number	i.1	i.2	i.3	i.4	i.5	i.6	i.7	i.8	i.9	i.10
Initial bacteria concentration, b1,0, [cells µm^{-3}]	0.146997	0.146997	0.340482	0.340482	0.340482	0.340482	0.317622	0.317622	0.317622	0.317622
Maximal planktonic growth rate, ɣ1, [s^{-1}]	0.000122176	0.000122176	0.0048036	0.0048036	0.0048036	0.0048036	0.00191727	0.00191727	0.00191727	0.00191727
Maximal biofilm growth rate, ɣ2, [s^{-1}]	0.000256966	0.000256966	0.000573503	0.000573503	0.000573503	0.000573503	4.44847e-05	4.44847e-05	4.44847e-05	4.44847e-05
Characteristic nutrient concentration, cchar, [molecules µm^{-3}]	0.183539	0.183539	1.73877	1.73877	1.73877	1.73877	1.70514	1.70514	1.70514	1.70514
Initial nutrient concentration, c0, [molecules µm^{-3}]	213175	213175	172314	172314	172314	172314	8064.7	8064.7	8064.7	8064.7
Nutrient consumption, planktonic, κ1, [molecules s^{-1} cell^{-1}]	2.3836e+06	2.3836e+06	9.14612e+06	9.14612e+06	9.14612e+06	9.14612e+06	435958	435958	435958	435958
Nutrient consumption, biofilm, κ2, [molecules s^{-1} cell^{-1}]	2.70836e+06	2.70836e+06	3.37395e+06	3.37395e+06	3.37395e+06	3.37395e+06	489.169	489.169	489.169	489.169
Planktonic diffusivity, D1, [µm^2/s]	0.1	1	5	5	1	0.1	25	25	25	15
Planktonic chemotaxis, χ1, [µm^2/s]	25	25	0.1	1	10	25	0.1	1	10	25
Autoinducer production rate, planktonic, k1, [molecules s^{-1} cell^{-1}]	0.924282	0.924282	203.769	203.769	203.769	203.769	2.50644	2.50644	2.50644	2.50644
Autoinducer production rate, biofilm, k2, [molecules s^{-1} cell^{-1}]	518.616	518.616	37586.8	37586.8	37586.8	37586.8	0.821365	0.821365	0.821365	0.821365
Autoinducer threshold concentration, a*, [molecules µm^{-3}]	0.816352	0.816352	38.3909	38.3909	38.3909	38.3909	0.270523	0.270523	0.270523	0.270523
Autoinducer diffusivity, Da, [µm^2/s]	98.1454	98.1454	3.10163	3.10163	3.10163	3.10163	30.9787	30.9787	30.9787	30.9787
Autoinducer-receptor binding coefficient, α, [µm^{3} s^{-1} cell^{-1}]	0.830024	0.830024	3.85133	3.85133	3.85133	3.85133	6.46477	6.46477	6.46477	6.46477
Chemotaxis upper limit concentration, c+, [molecules µm^{-3}]	18066	18066	18066	18066	18066	18066	18066	18066	18066	18066
Chemotaxis lower limit concentration, c-, [molecules µm^{-3}]	602.2	602.2	602.2	602.2	602.2	602.2	602.2	602.2	602.2	602.2
Autoinducer degradation rate, λ, [s^{-1}]	0.000277778	0.000277778	0.000277778	0.000277778	0.000277778	0.000277778	0.000277778	0.000277778	0.000277778	0.000277778
Planktonic transition rate, τ-1, [s^{-1}]	0.0166667	0.0166667	0.0166667	0.0166667	0.0166667	0.0166667	0.0166667	0.0166667	0.0166667	0.0166667
Nutrient diffusivity, Dc, [µm^2/s]	800	800	800	800	800	800	800	800	800	800
Fraction biofilm, f	0	0	0	0	0	0	0	0	0	0

## Sheet: Bar Graph (ii)
Simulation Number	ii.1	ii.2	ii.3	ii.4	ii.5	ii.6	ii.7	ii.8	ii.9	ii.10
Initial bacteria concentration, b1,0, [cells µm^{-3}]	0.0999204	0.0999204	0.0999204	0.692217	0.692217	0.0999204	0.0999204	0.0999204	0.692217	0.692217
Maximal planktonic growth rate, ɣ1, [s^{-1}]	8.52539e-06	8.52539e-06	8.52539e-06	4.9327e-06	4.9327e-06	8.52539e-06	8.52539e-06	8.52539e-06	4.9327e-06	4.9327e-06
Maximal biofilm growth rate, ɣ2, [s^{-1}]	0.000318201	0.000318201	0.000318201	0.000934459	0.000934459	0.000318201	0.000318201	0.000318201	0.000934459	0.000934459
Characteristic nutrient concentration, cchar, [molecules µm^{-3}]	0.427838	0.427838	0.427838	5.07385	5.07385	0.427838	0.427838	0.427838	5.07385	5.07385
Initial nutrient concentration, c0, [molecules µm^{-3}]	4.46061e+07	4.46061e+07	4.46061e+07	7.97595e+08	7.97595e+08	4.46061e+07	4.46061e+07	4.46061e+07	7.97595e+08	7.97595e+08
Nutrient consumption, planktonic, κ1, [molecules s^{-1} cell^{-1}]	934774	934774	934774	4.82095e+06	4.82095e+06	934774	934774	934774	4.82095e+06	4.82095e+06
Nutrient consumption, biofilm, κ2, [molecules s^{-1} cell^{-1}]	1.50536e+06	1.50536e+06	1.50536e+06	9.03518e+06	9.03518e+06	1.50536e+06	1.50536e+06	1.50536e+06	9.03518e+06	9.03518e+06
Planktonic diffusivity, D1, [µm^2/s]	5	10	15	10	15	5	10	15	10	15
Planktonic chemotaxis, χ1, [µm^2/s]	0.01	0.01	0.01	0.01	0.01	0.1	0.1	0.1	0.1	0.1
Autoinducer production rate, planktonic, k1, [molecules s^{-1} cell^{-1}]	0.666666	0.666666	0.666666	0.00024648	0.00024648	0.666666	0.666666	0.666666	0.00024648	0.00024648
Autoinducer production rate, biofilm, k2, [molecules s^{-1} cell^{-1}]	147.665	147.665	147.665	0.362161	0.362161	147.665	147.665	147.665	0.362161	0.362161
Autoinducer threshold concentration, a*, [molecules µm^{-3}]	83.6997	83.6997	83.6997	0.604769	0.604769	83.6997	83.6997	83.6997	0.604769	0.604769
Autoinducer diffusivity, Da, [µm^2/s]	3.14652	3.14652	3.14652	3.24193	3.24193	3.14652	3.14652	3.14652	3.24193	3.24193
Autoinducer-receptor binding coefficient, α, [µm^{3} s^{-1} cell^{-1}]	0.00794876	0.00794876	0.00794876	5.75683e-05	5.75683e-05	0.00794876	0.00794876	0.00794876	5.75683e-05	5.75683e-05
Chemotaxis upper limit concentration, c+, [molecules µm^{-3}]	18066	18066	18066	18066	18066	18066	18066	18066	18066	18066
Chemotaxis lower limit concentration, c-, [molecules µm^{-3}]	602.2	602.2	602.2	602.2	602.2	602.2	602.2	602.2	602.2	602.2
Autoinducer degradation rate, λ, [s^{-1}]	0.000277778	0.000277778	0.000277778	0.000277778	0.000277778	0.000277778	0.000277778	0.000277778	0.000277778	0.000277778
Planktonic transition rate, τ-1, [s^{-1}]	0.0166667	0.0166667	0.0166667	0.0166667	0.0166667	0.0166667	0.0166667	0.0166667	0.0166667	0.0166667
Nutrient diffusivity, Dc, [µm^2/s]	800	800	800	800	800	800	800	800	800	800
Fraction biofilm, f	0	0	0	0	0	0	0	0	0	0

## Sheet: Bar Graph (iii)
Simulation Number	iii.1	iii.2	iii.3	iii.4	iii.5	iii.6	iii.7	iii.8	iii.9	iii.10
Initial bacteria concentration, b1,0, [cells µm^{-3}]	0.1506	0.1506	0.00862359	0.00862359	0.0222572	0.0222572	0.358859	0.358859	0.280297	0.280297
Maximal planktonic growth rate, ɣ1, [s^{-1}]	3.37426e-05	3.37426e-05	4.15486e-06	4.15486e-06	1.63927e-05	1.63927e-05	1.18426e-05	1.18426e-05	2.73558e-06	2.73558e-06
Maximal biofilm growth rate, ɣ2, [s^{-1}]	2.29009e-06	2.29009e-06	2.17938e-05	2.17938e-05	2.02047e-06	2.02047e-06	0.000420025	0.000420025	0.0021103	0.0021103
Characteristic nutrient concentration, cchar, [molecules µm^{-3}]	18.4272	18.4272	9.18461	9.18461	0.517957	0.517957	0.369347	0.369347	2.41885	2.41885
Initial nutrient concentration, c0, [molecules µm^{-3}]	6.55399e+09	6.55399e+09	20502	20502	1.69061e+06	1.69061e+06	7.24406e+08	7.24406e+08	51517.7	51517.7
Nutrient consumption, planktonic, κ1, [molecules s^{-1} cell^{-1}]	5.28202e-44	5.28202e-44	2.48197e-08	2.48197e-08	1.13861e-09	1.13861e-09	0.0166463	0.0166463	0.0548894	0.0548894
Nutrient consumption, biofilm, κ2, [molecules s^{-1} cell^{-1}]	250.337	250.337	864.108	864.108	171303	171303	383.528	383.528	31298.9	31298.9
Planktonic diffusivity, D1, [µm^2/s]	1	1	1	1	1	1	5	5	5	10
Planktonic chemotaxis, χ1, [µm^2/s]	0.01	0.1	0.01	0.1	0.01	0.1	0.01	0.1	0.01	0.01
Autoinducer production rate, planktonic, k1, [molecules s^{-1} cell^{-1}]	0.0586102	0.0586102	0.0175335	0.0175335	9.75711e-05	9.75711e-05	0.179557	0.179557	4.29822e-05	4.29822e-05
Autoinducer production rate, biofilm, k2, [molecules s^{-1} cell^{-1}]	0.0326188	0.0326188	6.26171	6.26171	0.127446	0.127446	3.74983	3.74983	2.06692	2.06692
Autoinducer threshold concentration, a*, [molecules µm^{-3}]	272.968	272.968	2.88734	2.88734	0.0251446	0.0251446	533.512	533.512	0.0676329	0.0676329
Autoinducer diffusivity, Da, [µm^2/s]	0.0506806	0.0506806	0.0173657	0.0173657	0.0422571	0.0422571	4.2058	4.2058	0.197191	0.197191
Autoinducer-receptor binding coefficient, α, [µm^{3} s^{-1} cell^{-1}]	3.06584e-06	3.06584e-06	0.00163979	0.00163979	0.00163274	0.00163274	0.0001119	0.0001119	0.000207281	0.000207281
Chemotaxis upper limit concentration, c+, [molecules µm^{-3}]	18066	18066	18066	18066	18066	18066	18066	18066	18066	18066
Chemotaxis lower limit concentration, c-, [molecules µm^{-3}]	602.2	602.2	602.2	602.2	602.2	602.2	602.2	602.2	602.2	602.2
Autoinducer degradation rate, λ, [s^{-1}]	0.000277778	0.000277778	0.000277778	0.000277778	0.000277778	0.000277778	0.000277778	0.000277778	0.000277778	0.000277778
Planktonic transition rate, τ-1, [s^{-1}]	0.0166667	0.0166667	0.0166667	0.0166667	0.0166667	0.0166667	0.0166667	0.0166667	0.0166667	0.0166667
Nutrient diffusivity, Dc, [µm^2/s]	800	800	800	800	800	800	800	800	800	800
Fraction biofilm, f	0	0	0	0	0	0	0	0	0	0

## Sheet: Bar Graph (iv)
Simulation Number	iv.1	iv.2	iv.3	iv.4	iv.5	iv.6	iv.7	iv.8	iv.9	iv.10
Initial bacteria concentration, b1,0, [cells µm^{-3}]	0.0421367	0.0421367	0.0318793	0.0318793	0.0874803	0.0874803	0.159985	0.0219094	0.0219094	0.181206
Maximal planktonic growth rate, ɣ1, [s^{-1}]	4.16365e-06	4.16365e-06	0.000102589	0.000102589	1.3096e-08	1.3096e-08	0.000115145	3.28172e-06	3.28172e-06	1.07997e-07
Maximal biofilm growth rate, ɣ2, [s^{-1}]	4.19223e-06	4.19223e-06	2.17059e-06	2.17059e-06	1.37106e-05	1.37106e-05	1.18211e-06	4.0225e-05	4.0225e-05	6.22241e-05
Characteristic nutrient concentration, cchar, [molecules µm^{-3}]	1.15301	1.15301	0.304299	0.304299	0.180801	0.180801	5.18172	6853	6853	0.0213507
Initial nutrient concentration, c0, [molecules µm^{-3}]	1.68811e+08	1.68811e+08	1.12678e+08	1.12678e+08	522975	522975	1.20543e+08	11775	11775	1.08428e+06
Nutrient consumption, planktonic, κ1, [molecules s^{-1} cell^{-1}]	6.18675	6.18675	2749.69	2749.69	102.168	102.168	3.08724e-115	7.09769	7.09769	121.309
Nutrient consumption, biofilm, κ2, [molecules s^{-1} cell^{-1}]	9299.79	9299.79	1505.08	1505.08	126948	126948	406992	5710.97	5710.97	112487
Planktonic diffusivity, D1, [µm^2/s]	0.1	0.1	5	5	2	2	0.1	2	2	5
Planktonic chemotaxis, χ1, [µm^2/s]	0.01	0.1	0.01	0.1	500	250	0.01	500	250	500
Autoinducer production rate, planktonic, k1, [molecules s^{-1} cell^{-1}]	0.00334465	0.00334465	220.367	220.367	0.0872662	0.0872662	0.0197478	0.0313523	0.0313523	28.9724
Autoinducer production rate, biofilm, k2, [molecules s^{-1} cell^{-1}]	0.00110199	0.00110199	0.8441	0.8441	12.0398	12.0398	2.63881	2.17973	2.17973	3743.12
Autoinducer threshold concentration, a*, [molecules µm^{-3}]	0.230934	0.230934	456.452	456.452	0.991981	0.991981	15.6145	0.0898845	0.0898845	721.612
Autoinducer diffusivity, Da, [µm^2/s]	0.0716247	0.0716247	3.2928	3.2928	0.0167475	0.0167475	0.161203	0.947803	0.947803	8.52958
Autoinducer-receptor binding coefficient, α, [µm^{3} s^{-1} cell^{-1}]	0.0125612	0.0125612	0.271922	0.271922	0.0220975	0.0220975	0.000515794	0.138862	0.138862	0.00401496
Chemotaxis upper limit concentration, c+, [molecules µm^{-3}]	18066	18066	18066	18066	18066	18066	18066	18066	18066	18066
Chemotaxis lower limit concentration, c-, [molecules µm^{-3}]	602.2	602.2	602.2	602.2	602.2	602.2	602.2	602.2	602.2	602.2
Autoinducer degradation rate, λ, [s^{-1}]	0.000277778	0.000277778	0.000277778	0.000277778	0.000416667	0.000416667	0.000277778	0.000416667	0.000416667	0.000416667
Planktonic transition rate, τ-1, [s^{-1}]	0.0166667	0.0166667	0.0166667	0.0166667	0.0166667	0.0166667	0.0166667	0.0166667	0.0166667	0.0166667
Nutrient diffusivity, Dc, [µm^2/s]	800	800	800	800	800	800	800	800	800	800
Fraction biofilm, f	0	0	0.808008	0.808038	0.880016	0.897918	0.987516	0.983901	0.994522	0.999998

## Sheet: Bar Graph (v)
Simulation Number	v.1	v.2	v.3	v.4	v.5	v.6	v.7	v.8	v.9	v.10
Initial bacteria concentration, b1,0, [cells µm^{-3}]	0.428332	0.428332	0.428332	0.428332	0.0102404	0.0102404	0.0102404	0.0102404	0.0102404	0.0102404
Maximal planktonic growth rate, ɣ1, [s^{-1}]	2.1514e-06	2.1514e-06	2.1514e-06	2.1514e-06	1.56442e-09	1.56442e-09	1.56442e-09	1.56442e-09	1.56442e-09	1.56442e-09
Maximal biofilm growth rate, ɣ2, [s^{-1}]	4.09665e-05	4.09665e-05	4.09665e-05	4.09665e-05	1.80235e-05	1.80235e-05	1.80235e-05	1.80235e-05	1.80235e-05	1.80235e-05
Characteristic nutrient concentration, cchar, [molecules µm^{-3}]	2.87565	2.87565	2.87565	2.87565	5.77214	5.77214	5.77214	5.77214	5.77214	5.77214
Initial nutrient concentration, c0, [molecules µm^{-3}]	3.37224e+08	3.37224e+08	3.37224e+08	3.37224e+08	380565	380565	380565	380565	380565	380565
Nutrient consumption, planktonic, κ1, [molecules s^{-1} cell^{-1}]	8468.21	8468.21	8468.21	8468.21	400.846	400.846	400.846	400.846	400.846	400.846
Nutrient consumption, biofilm, κ2, [molecules s^{-1} cell^{-1}]	249.421	249.421	249.421	249.421	3639.21	3639.21	3639.21	3639.21	3639.21	3639.21
Planktonic diffusivity, D1, [µm^2/s]	0.01	0.1	0.01	0.1	0.1	0.05	0.1	0.05	0.1	0.05
Planktonic chemotaxis, χ1, [µm^2/s]	0.01	0.01	0.1	0.1	100	100	75	75	50	50
Autoinducer production rate, planktonic, k1, [molecules s^{-1} cell^{-1}]	0.426582	0.426582	0.426582	0.426582	0.759667	0.759667	0.759667	0.759667	0.759667	0.759667
Autoinducer production rate, biofilm, k2, [molecules s^{-1} cell^{-1}]	0.023581	0.023581	0.023581	0.023581	1.34539	1.34539	1.34539	1.34539	1.34539	1.34539
Autoinducer threshold concentration, a*, [molecules µm^{-3}]	25.2225	25.2225	25.2225	25.2225	2.81384	2.81384	2.81384	2.81384	2.81384	2.81384
Autoinducer diffusivity, Da, [µm^2/s]	0.67404	0.67404	0.67404	0.67404	0.290997	0.290997	0.290997	0.290997	0.290997	0.290997
Autoinducer-receptor binding coefficient, α, [µm^{3} s^{-1} cell^{-1}]	0.015557	0.015557	0.015557	0.015557	0.0853737	0.0853737	0.0853737	0.0853737	0.0853737	0.0853737
Chemotaxis upper limit concentration, c+, [molecules µm^{-3}]	18066	18066	18066	18066	18066	18066	18066	18066	18066	18066
Chemotaxis lower limit concentration, c-, [molecules µm^{-3}]	602.2	602.2	602.2	602.2	602.2	602.2	602.2	602.2	602.2	602.2
Autoinducer degradation rate, λ, [s^{-1}]	0.000277778	0.000277778	0.000277778	0.000277778	0.000416667	0.000416667	0.000416667	0.000416667	0.000416667	0.000416667
Planktonic transition rate, τ-1, [s^{-1}]	0.0166667	0.0166667	0.0166667	0.0166667	0.0166667	0.0166667	0.0166667	0.0166667	0.0166667	0.0166667
Nutrient diffusivity, Dc, [µm^2/s]	800	800	800	800	800	800	800	800	800	800
Fraction biofilm, f	1	1	1	1	0.999983	0.999867	0.999983	0.999867	0.999983	0.999868

## Sheet: Bar Graph (vi)
Simulation Number	vi.1	vi.2	vi.3	vi.4	vi.5	vi.6	vi.7	vi.8	vi.9	vi.10
Initial bacteria concentration, b1,0, [cells µm^{-3}]	0.539813	0.539813	0.539813	0.0869081	0.0869081	0.00167706	0.00167706	0.00167706	0.00167706	0.00167706
Maximal planktonic growth rate, ɣ1, [s^{-1}]	0.00380005	0.00380005	0.00380005	1.43262e-06	1.43262e-06	8.10027e-06	8.10027e-06	8.10027e-06	8.10027e-06	8.10027e-06
Maximal biofilm growth rate, ɣ2, [s^{-1}]	0.00120267	0.00120267	0.00120267	0.000442752	0.000442752	3.92282e-06	3.92282e-06	3.92282e-06	3.92282e-06	3.92282e-06
Characteristic nutrient concentration, cchar, [molecules µm^{-3}]	0.781412	0.781412	0.781412	0.431135	0.431135	148.857	148.857	148.857	148.857	148.857
Initial nutrient concentration, c0, [molecules µm^{-3}]	8288	8288	8288	35374.5	35374.5	306909	306909	306909	306909	306909
Nutrient consumption, planktonic, κ1, [molecules s^{-1} cell^{-1}]	81658.9	81658.9	81658.9	333231	333231	796209	796209	796209	796209	796209
Nutrient consumption, biofilm, κ2, [molecules s^{-1} cell^{-1}]	5618.31	5618.31	5618.31	1940.58	1940.58	141.204	141.204	141.204	141.204	141.204
Planktonic diffusivity, D1, [µm^2/s]	25	25	25	25	25	0.1	10	15	0.01	0.1
Planktonic chemotaxis, χ1, [µm^2/s]	0.1	1	10	0.1	1	0.01	0.1	0.1	1	1
Autoinducer production rate, planktonic, k1, [molecules s^{-1} cell^{-1}]	360.184	360.184	360.184	1220.23	1220.23	1.40978	1.40978	1.40978	1.40978	1.40978
Autoinducer production rate, biofilm, k2, [molecules s^{-1} cell^{-1}]	1645.68	1645.68	1645.68	234.152	234.152	0.0207606	0.0207606	0.0207606	0.0207606	0.0207606
Autoinducer threshold concentration, a*, [molecules µm^{-3}]	48.4753	48.4753	48.4753	81.7047	81.7047	0.326381	0.326381	0.326381	0.326381	0.326381
Autoinducer diffusivity, Da, [µm^2/s]	72.6577	72.6577	72.6577	98.93	98.93	2738.3	2738.3	2738.3	2738.3	2738.3
Autoinducer-receptor binding coefficient, α, [µm^{3} s^{-1} cell^{-1}]	3.43062	3.43062	3.43062	9.46887	9.46887	2.91541	2.91541	2.91541	2.91541	2.91541
Chemotaxis upper limit concentration, c+, [molecules µm^{-3}]	18066	18066	18066	18066	18066	18066	18066	18066	18066	18066
Chemotaxis lower limit concentration, c-, [molecules µm^{-3}]	602.2	602.2	602.2	602.2	602.2	602.2	602.2	602.2	602.2	602.2
Autoinducer degradation rate, λ, [s^{-1}]	0.000277778	0.000277778	0.000277778	0.000277778	0.000277778	0.000416667	0.000416667	0.000416667	0.000416667	0.000416667
Planktonic transition rate, τ-1, [s^{-1}]	0.0166667	0.0166667	0.0166667	0.0166667	0.0166667	0.0166667	0.0166667	0.0166667	0.0166667	0.0166667
Nutrient diffusivity, Dc, [µm^2/s]	800	800	800	800	800	800	800	800	800	800
Fraction biofilm, f	0.000266164	0.000266317	0.000267675	0.00930119	0.00930076	0.997414	1	1	0.995197	0.997414
