# Supplementary material for: A biophysical threshold for biofilm formation
Source: eLife. 2022 Jun 1;11:e76380. doi: 10.7554/eLife.76380 (PMC9302973; doi:10.7554/eLife.76380)
Supplement: Figure 4—source data 3. [file elife-76380-fig4-data3.xlsx]

## Sheet: Fig 4D
X Data, Nutrient Availability Parameter, D	Y Data, Dispersal Parameter, J	Z Data, Fraction biofilm, f
0.0147911	788.255	0
0.0323594	788.255	0
0.0707946	788.255	0
0.154882	788.255	0.0142068
0.338844	788.255	0
0.74131	788.255	0.760648
1.62181	788.255	0.662446
3.54813	788.255	0.856819
7.76247	788.255	0.499654
16.9824	788.255	0.601832
37.1535	788.255	0.632407
81.2831	788.255	0.776568
177.828	788.255	0.683073
389.045	788.255	0.286594
851.138	788.255	0.875612
0.0147911	309.03	0
0.0323594	309.03	0
0.0707946	309.03	0.000187679
0.154882	309.03	0.0106551
0.338844	309.03	0.0708463
0.74131	309.03	0.880785
1.62181	309.03	0.684935
3.54813	309.03	0.813976
7.76247	309.03	0.874123
16.9824	309.03	0.613264
37.1535	309.03	0.418309
81.2831	309.03	0.752063
177.828	309.03	0.656491
389.045	309.03	0.66466
851.138	309.03	0.906331
0.0147911	121.153	0
0.0323594	121.153	0
0.0707946	121.153	0
0.154882	121.153	0.0566973
0.338844	121.153	0.274457
0.74131	121.153	0.306132
1.62181	121.153	0.56086
3.54813	121.153	0.619648
7.76247	121.153	0.648937
16.9824	121.153	0.821804
37.1535	121.153	0.706322
81.2831	121.153	0.363586
177.828	121.153	0.725862
389.045	121.153	0.816256
851.138	121.153	0.367064
0.0147911	47.4971	0
0.0323594	47.4971	0
0.0707946	47.4971	0.0175149
0.154882	47.4971	0.354375
0.338844	47.4971	0.321948
0.74131	47.4971	0.516168
1.62181	47.4971	0.338174
3.54813	47.4971	0.327062
7.76247	47.4971	0.608948
16.9824	47.4971	0.741089
37.1535	47.4971	0.43669
81.2831	47.4971	0.836132
177.828	47.4971	0.999975
389.045	47.4971	0.858127
851.138	47.4971	0.765209
0.0147911	18.6209	0
0.0323594	18.6209	0
0.0707946	18.6209	0.00955333
0.154882	18.6209	0.0182642
0.338844	18.6209	0.331603
0.74131	18.6209	0.717886
1.62181	18.6209	0.489376
3.54813	18.6209	0.179473
7.76247	18.6209	0.475098
16.9824	18.6209	0.503937
37.1535	18.6209	0.142525
81.2831	18.6209	0.750119
177.828	18.6209	0.373801
389.045	18.6209	0.787718
851.138	18.6209	0.581939
0.0147911	7.30018	0
0.0323594	7.30018	0
0.0707946	7.30018	0
0.154882	7.30018	0
0.338844	7.30018	0.47656
0.74131	7.30018	0.37746
1.62181	7.30018	0.147315
3.54813	7.30018	0.219107
7.76247	7.30018	0.809362
16.9824	7.30018	0.604417
37.1535	7.30018	0.0564968
81.2831	7.30018	0.915283
177.828	7.30018	0.691124
389.045	7.30018	0.498642
851.138	7.30018	0.668738
0.0147911	2.86198	0.332609
0.0323594	2.86198	0
0.0707946	2.86198	0
0.154882	2.86198	0.142906
0.338844	2.86198	0
0.74131	2.86198	0.402624
1.62181	2.86198	0.310862
3.54813	2.86198	0.394513
7.76247	2.86198	0.514156
16.9824	2.86198	0.832357
37.1535	2.86198	0.00604321
81.2831	2.86198	0.843116
177.828	2.86198	0.604604
389.045	2.86198	0.97048
851.138	2.86198	0.504908
0.0147911	1.12202	0
0.0323594	1.12202	0
0.0707946	1.12202	0.666689
0.154882	1.12202	0.101199
0.338844	1.12202	0
0.74131	1.12202	0.817184
1.62181	1.12202	0
3.54813	1.12202	0.128692
7.76247	1.12202	0.657199
16.9824	1.12202	0.279949
37.1535	1.12202	0.381812
81.2831	1.12202	0.303734
177.828	1.12202	0.42343
389.045	1.12202	0.74304
851.138	1.12202	0.896489
0.0147911	0.439879	0
0.0323594	0.439879	0
0.0707946	0.439879	0
0.154882	0.439879	0.0959861
0.338844	0.439879	0.219027
0.74131	0.439879	0.123952
1.62181	0.439879	0
3.54813	0.439879	1
7.76247	0.439879	0.420463
16.9824	0.439879	0.134752
37.1535	0.439879	0.0463061
81.2831	0.439879	0.446448
177.828	0.439879	0.689188
389.045	0.439879	0.334482
851.138	0.439879	0.826409
0.0147911	0.172451	0
0.0323594	0.172451	0
0.0707946	0.172451	0
0.154882	0.172451	0.0119983
0.338844	0.172451	0
0.74131	0.172451	0.601893
1.62181	0.172451	0.215837
3.54813	0.172451	0.218418
7.76247	0.172451	0
16.9824	0.172451	0
37.1535	0.172451	0
81.2831	0.172451	0.199329
177.828	0.172451	0.159355
389.045	0.172451	0.378264
851.138	0.172451	0.784561
0.0147911	0.0676083	0
0.0323594	0.0676083	0
0.0707946	0.0676083	0
0.154882	0.0676083	0
0.338844	0.0676083	0.0767837
0.74131	0.0676083	0.00037811
1.62181	0.0676083	0.10264
3.54813	0.0676083	0.000473732
7.76247	0.0676083	0.0079291
16.9824	0.0676083	0.0254118
37.1535	0.0676083	0
81.2831	0.0676083	0.00461682
177.828	0.0676083	0
389.045	0.0676083	0
851.138	0.0676083	0
0.0147911	0.0265053	0
0.0323594	0.0265053	0
0.0707946	0.0265053	0
0.154882	0.0265053	0
0.338844	0.0265053	0
0.74131	0.0265053	0
1.62181	0.0265053	0
3.54813	0.0265053	0.00253627
7.76247	0.0265053	0
16.9824	0.0265053	0
37.1535	0.0265053	0
81.2831	0.0265053	0.00797832
177.828	0.0265053	0
389.045	0.0265053	0.0264864
851.138	0.0265053	0
0.0147911	0.0103912	0
0.0323594	0.0103912	0
0.0707946	0.0103912	0
0.154882	0.0103912	0
0.338844	0.0103912	0
0.74131	0.0103912	0
1.62181	0.0103912	0
3.54813	0.0103912	0
7.76247	0.0103912	0.00115985
16.9824	0.0103912	0
37.1535	0.0103912	0
81.2831	0.0103912	0.0290262
177.828	0.0103912	0.00727146
389.045	0.0103912	0.0407219
851.138	0.0103912	0
0.0147911	0.0040738	0
0.0323594	0.0040738	0
0.0707946	0.0040738	0
0.154882	0.0040738	0
0.338844	0.0040738	0
0.74131	0.0040738	0
1.62181	0.0040738	0
3.54813	0.0040738	0
7.76247	0.0040738	0.000774361
16.9824	0.0040738	0.0194733
37.1535	0.0040738	0
81.2831	0.0040738	0
177.828	0.0040738	0
389.045	0.0040738	0
851.138	0.0040738	0
0.0147911	0.0015971	0
0.0323594	0.0015971	0
0.0707946	0.0015971	0
0.154882	0.0015971	0
0.338844	0.0015971	0
0.74131	0.0015971	0
1.62181	0.0015971	0
3.54813	0.0015971	0
7.76247	0.0015971	0.00580453
16.9824	0.0015971	0
37.1535	0.0015971	0
81.2831	0.0015971	0
177.828	0.0015971	0
389.045	0.0015971	0
851.138	0.0015971	0

## Sheet: Fig 4E
X Data, Nutrient Availability Parameter, D	Y Data, Dispersal Parameter, J	Z Data, Fraction biofilm standard deviation, σf
0.0147911	788.255	0
0.0323594	788.255	0
0.0707946	788.255	0
0.154882	788.255	0
0.338844	788.255	0
0.74131	788.255	0.36933
1.62181	788.255	0
3.54813	788.255	0.199884
7.76247	788.255	0.344258
16.9824	788.255	0.319562
37.1535	788.255	0
81.2831	788.255	0.152523
177.828	788.255	0.189188
389.045	788.255	0.341319
851.138	788.255	0.205111
0.0147911	309.03	0
0.0323594	309.03	0
0.0707946	309.03	0.000562168
0.154882	309.03	0
0.338844	309.03	0.212539
0.74131	309.03	0.322172
1.62181	309.03	0
3.54813	309.03	0.285854
7.76247	309.03	0.217033
16.9824	309.03	0.294032
37.1535	309.03	0.500341
81.2831	309.03	0.248818
177.828	309.03	0.39983
389.045	309.03	0.0693981
851.138	309.03	0.206063
0.0147911	121.153	0
0.0323594	121.153	0
0.0707946	121.153	0
0.154882	121.153	0
0.338844	121.153	0
0.74131	121.153	0.36826
1.62181	121.153	0.284695
3.54813	121.153	0.335514
7.76247	121.153	0.352299
16.9824	121.153	0.268285
37.1535	121.153	0.218131
81.2831	121.153	0.0384007
177.828	121.153	0.248164
389.045	121.153	0.196685
851.138	121.153	0.379285
0.0147911	47.4971	0
0.0323594	47.4971	0
0.0707946	47.4971	0.0776133
0.154882	47.4971	0.412497
0.338844	47.4971	0
0.74131	47.4971	0.49958
1.62181	47.4971	0.267167
3.54813	47.4971	0.310218
7.76247	47.4971	0.399812
16.9824	47.4971	0.215148
37.1535	47.4971	0.343706
81.2831	47.4971	0.276609
177.828	47.4971	9.85969e-05
389.045	47.4971	0.243705
851.138	47.4971	4.91674e-05
0.0147911	18.6209	0
0.0323594	18.6209	0
0.0707946	18.6209	0.0654944
0.154882	18.6209	0.118829
0.338844	18.6209	0.513728
0.74131	18.6209	0.368601
1.62181	18.6209	0.289073
3.54813	18.6209	0.295273
7.76247	18.6209	0.35289
16.9824	18.6209	0.404408
37.1535	18.6209	0.362293
81.2831	18.6209	0.355073
177.828	18.6209	0.466706
389.045	18.6209	0.372477
851.138	18.6209	0.00538228
0.0147911	7.30018	0
0.0323594	7.30018	0
0.0707946	7.30018	0
0.154882	7.30018	0
0.338844	7.30018	0.43922
0.74131	7.30018	0.410762
1.62181	7.30018	0.0827482
3.54813	7.30018	0.250756
7.76247	7.30018	0.359933
16.9824	7.30018	0.486656
37.1535	7.30018	0.133831
81.2831	7.30018	0.146624
177.828	7.30018	0.31981
389.045	7.30018	0.401966
851.138	7.30018	0
0.0147911	2.86198	0.467585
0.0323594	2.86198	0
0.0707946	2.86198	0
0.154882	2.86198	0
0.338844	2.86198	0
0.74131	2.86198	0.449624
1.62181	2.86198	0
3.54813	2.86198	0.476293
7.76247	2.86198	0.492445
16.9824	2.86198	0.258011
37.1535	2.86198	0.010331
81.2831	2.86198	0.29471
177.828	2.86198	0.432727
389.045	2.86198	0.0623337
851.138	2.86198	0.477801
0.0147911	1.12202	0
0.0323594	1.12202	0
0.0707946	1.12202	0.475795
0.154882	1.12202	0
0.338844	1.12202	0
0.74131	1.12202	0.314942
1.62181	1.12202	0
3.54813	1.12202	0.336015
7.76247	1.12202	0.445435
16.9824	1.12202	0.397443
37.1535	1.12202	0.464552
81.2831	1.12202	0.424703
177.828	1.12202	0.507459
389.045	1.12202	0.359129
851.138	1.12202	0.284522
0.0147911	0.439879	0
0.0323594	0.439879	0
0.0707946	0.439879	0
0.154882	0.439879	0
0.338844	0.439879	0
0.74131	0.439879	0.292477
1.62181	0.439879	0
3.54813	0.439879	0
7.76247	0.439879	0.456199
16.9824	0.439879	0.321957
37.1535	0.439879	0.200548
81.2831	0.439879	0.459872
177.828	0.439879	0.366402
389.045	0.439879	0.366563
851.138	0.439879	0.264284
0.0147911	0.172451	0
0.0323594	0.172451	0
0.0707946	0.172451	0
0.154882	0.172451	0
0.338844	0.172451	0
0.74131	0.172451	0.408917
1.62181	0.172451	0
3.54813	0.172451	0
7.76247	0.172451	0
16.9824	0.172451	0
37.1535	0.172451	0
81.2831	0.172451	0.372724
177.828	0.172451	0.322295
389.045	0.172451	0.425726
851.138	0.172451	0.400128
0.0147911	0.0676083	0
0.0323594	0.0676083	0
0.0707946	0.0676083	0
0.154882	0.0676083	0
0.338844	0.0676083	0
0.74131	0.0676083	0.000725241
1.62181	0.0676083	0
3.54813	0.0676083	0.00162579
7.76247	0.0676083	0.0353599
16.9824	0.0676083	0.133925
37.1535	0.0676083	0
81.2831	0.0676083	0.0544311
177.828	0.0676083	0
389.045	0.0676083	0
851.138	0.0676083	0
0.0147911	0.0265053	0
0.0323594	0.0265053	0
0.0707946	0.0265053	0
0.154882	0.0265053	0
0.338844	0.0265053	0
0.74131	0.0265053	0
1.62181	0.0265053	0
3.54813	0.0265053	0.00412363
7.76247	0.0265053	0
16.9824	0.0265053	0
37.1535	0.0265053	0
81.2831	0.0265053	0.0597029
177.828	0.0265053	0
389.045	0.0265053	0.1077
851.138	0.0265053	0
0.0147911	0.0103912	0
0.0323594	0.0103912	0
0.0707946	0.0103912	0
0.154882	0.0103912	0
0.338844	0.0103912	0
0.74131	0.0103912	0
1.62181	0.0103912	0
3.54813	0.0103912	0
7.76247	0.0103912	0.0133604
16.9824	0.0103912	0
37.1535	0.0103912	0
81.2831	0.0103912	0.0727967
177.828	0.0103912	0.0488447
389.045	0.0103912	0.12132
851.138	0.0103912	0
0.0147911	0.0040738	0
0.0323594	0.0040738	0
0.0707946	0.0040738	0
0.154882	0.0040738	0
0.338844	0.0040738	0
0.74131	0.0040738	0
1.62181	0.0040738	0
3.54813	0.0040738	0
7.76247	0.0040738	0.0099316
16.9824	0.0040738	0.0589012
37.1535	0.0040738	0
81.2831	0.0040738	0
177.828	0.0040738	0
389.045	0.0040738	0
851.138	0.0040738	0
0.0147911	0.0015971	0
0.0323594	0.0015971	0
0.0707946	0.0015971	0
0.154882	0.0015971	0
0.338844	0.0015971	0
0.74131	0.0015971	0
1.62181	0.0015971	0
3.54813	0.0015971	0
7.76247	0.0015971	0.0265517
16.9824	0.0015971	0
37.1535	0.0015971	0
81.2831	0.0015971	0
177.828	0.0015971	0
389.045	0.0015971	0
851.138	0.0015971	0
